# Supplementary material
Source: PubMed Central journal article supplement (PMC6731377)
Supplement: mmc1.pdf [file mmc1.pdf]

**Biophysical Journal, Volume 117**

**Supplemental Information**

**Identification of Multiple Kinetic Populations of DNA-Binding Proteins  
in Live Cells**

**Han N. Ho, Daniel Zalami, Jürgen Köhler, Antoine M. van Oijen, and Harshad Ghodke**

## Supplementary table

**Table S1.** Initial conditions, constraints and termination tolerance used in global fitting.  $n_0$  is the minimum number of counts in the second bin across  $\tau_{tl}$ .

| Model                  | Initial conditions                                                                                                                                             | Bound constraints                                                                                                                                                                                                                                                                                                            | Termination tolerance | Algorithm               | MATLAB function  |
|------------------------|----------------------------------------------------------------------------------------------------------------------------------------------------------------|------------------------------------------------------------------------------------------------------------------------------------------------------------------------------------------------------------------------------------------------------------------------------------------------------------------------------|-----------------------|-------------------------|------------------|
| <b>Mono</b><br>(Eq. 2) | $k_b = 1 \text{ s}^{-1}$<br>$k_{off} = 1 \text{ s}^{-1}$                                                                                                       | $k_b > 0 \text{ s}^{-1}$<br>$0 \text{ s}^{-1} < k_{off} < 1/\tau_{int} \text{ s}^{-1}$                                                                                                                                                                                                                                       | $10^{-6}$             | trust-region-reflective | <i>lsqnonlin</i> |
| <b>Bi</b><br>(Eq. 5)   | $k_b = 1 \text{ s}^{-1}$<br>$k_{off1} = 1 \text{ s}^{-1}$<br>$B = 0.5$<br>$k_{off2} = 2 \text{ s}^{-1}$                                                        | $k_b > 0$<br>$10^{-3} \text{ s}^{-1} < k_{off1} < 1/\tau_{int} \text{ s}^{-1}$<br>$1/n_0 < B < 1 - 1/n_0$<br>$10^{-3} \text{ s}^{-1} < k_{off2} < 1/\tau_{int} \text{ s}^{-1}$                                                                                                                                               | $10^{-6}$             | trust-region-reflective | <i>lsqnonlin</i> |
| <b>Tri</b><br>(Eq. 6)  | $k_b = 1 \text{ s}^{-1}$<br>$k_{off1} = 0.05 \text{ s}^{-1}$<br>$B_1 = 0.3$<br>$k_{off2} = 0.5 \text{ s}^{-1}$<br>$B_2 = 0.3$<br>$k_{off2} = 5 \text{ s}^{-1}$ | $k_b > 0 \text{ s}^{-1}$<br>$10^{-3} \text{ s}^{-1} < k_{off1} < 1/\tau_{int} \text{ s}^{-1}$<br>$1/n_0 < B_1 < 1 - 1/n_0$<br>$10^{-3} \text{ s}^{-1} < k_{off2} < 1/\tau_{int} \text{ s}^{-1}$<br>$1/n_0 < B_2 < 1 - 1/n_0$<br>$10^{-3} \text{ s}^{-1} < k_{off3} < 1/\tau_{int} \text{ s}^{-1}$<br>$B_1 + B_2 < 1 - 2/n_0$ | $10^{-9}$             | trust-region-reflective | <i>fmincon</i>   |

**Table S2.** The  $\tau_{tl}$  sets used in the study.

| $\tau_{tl}$ sets | $\tau_{tl}$ values (s)                     |
|------------------|--------------------------------------------|
| 10-s             | 0.1, 0.2, 0.3, 0.4, 0.6, 1, 2, 3, 5, 8, 10 |
| 100-s            | 0.1, 0.3, 0.7, 1, 3, 7, 10, 30, 70, 100    |
| Three-           | 0.1, 1, 10                                 |
| Five-            | 0.1, 0.3, 1, 3, 10                         |

## Supplementary figures

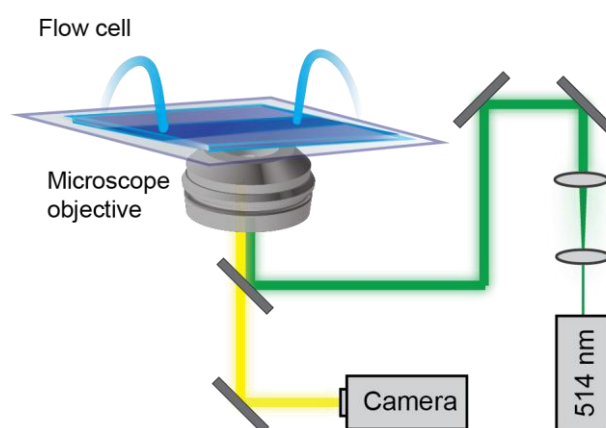

**Figure S1. Schematic of experimental setups in single-molecule live-cell imaging.** Bacteria expressing fluorescently labelled proteins are loaded in a flow cell with a constant supply of media at 30 °C. The fluorescent label (YPet) is excited with 514-nm light and fluorescence signal is recorded with an electron-multiplying CCD camera.

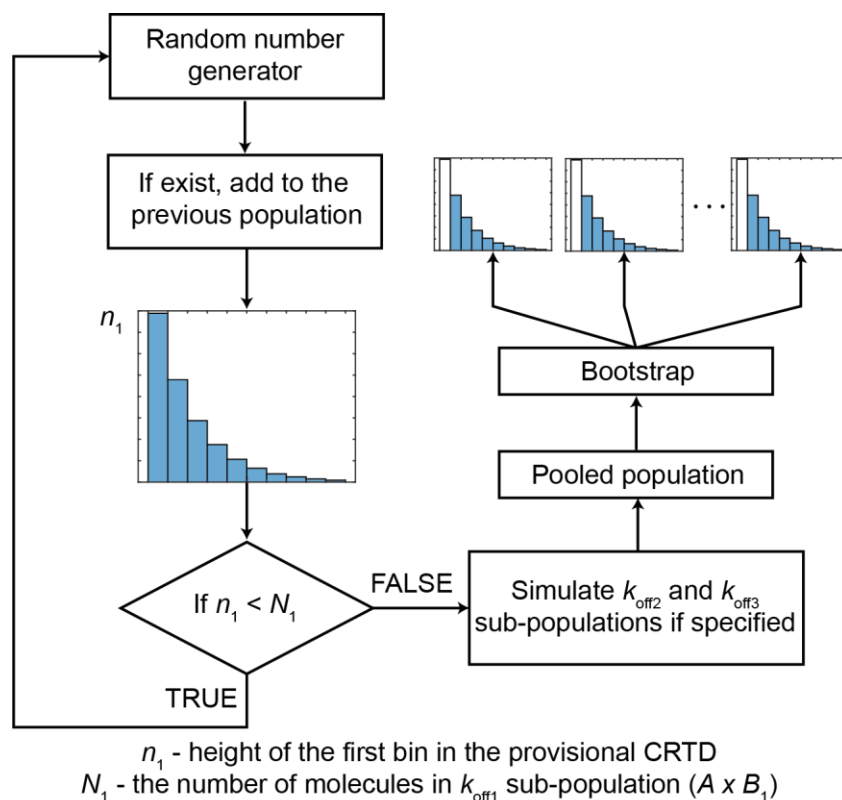

**Figure S2. Schematic of the simulation of the cumulative residence time distribution (CRTD) at a specified  $\tau_{\text{tl}}$ .** The molecules were generated by a random number generator to produce a group of numbers following an exponential distribution (defined by  $k_{\text{off}1}$ ,  $k_b$ ,  $\tau_{\text{int}}$  and  $\tau_{\text{tl}}$ ) (see Eq. 4-6 in main text). The number generator function was called a few times (typically 3-6) until the number of molecules in the first bin ( $n_1$ ) of the histogram exceeded the user-specified number of molecules ( $N_1$ ,  $N_1 = A \times B$  in mono-exponential distribution, or  $N_1 = A \times B_1$  in multiple-exponential distribution). The  $k_{\text{off}2}$  and  $k_{\text{off}3}$  sub-populations were simulated in the same manner. Then, molecules from all simulated sub-populations were pooled and subject to bootstrapping analysis to construct the bootstrapped CRTDs (referred simply as CRTDs). This procedure was repeated for all specified values of  $\tau_{\text{tl}}$ . The global fitting was performed on CRTDs from all  $\tau_{\text{tl}}$ , using a CRTD for each  $\tau_{\text{tl}}$ .

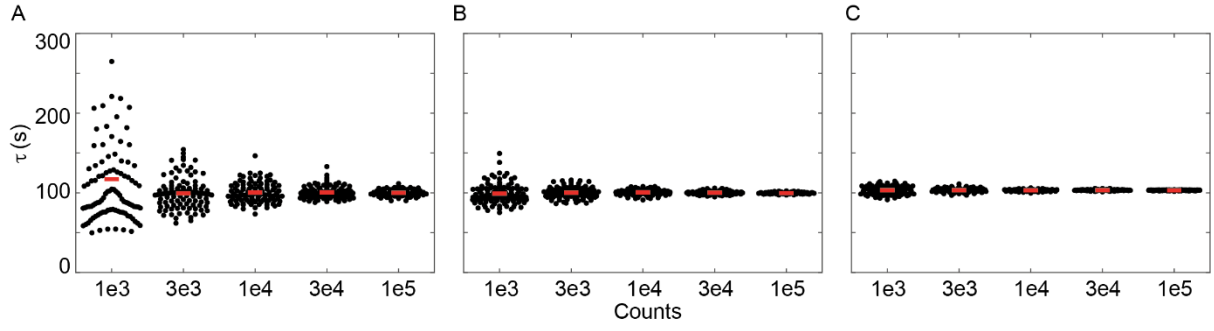

**Figure S3.** Scatter plots show distributions of  $\tau$  obtained using global fitting on 100 simulated mono-exponential ( $\langle\tau\rangle = 100$  s) for each  $n$  value. (A) Simulation using the 10-s  $\tau_{fl}$  set. (B) Simulation using the 100-s  $\tau_{fl}$  set. (C) Simulated data from (B) were globally fitted with the amplitude as the global parameter. Apart from this panel, all global fittings in this study were performed with  $A$  as the local parameter. Red bars represent the averages.

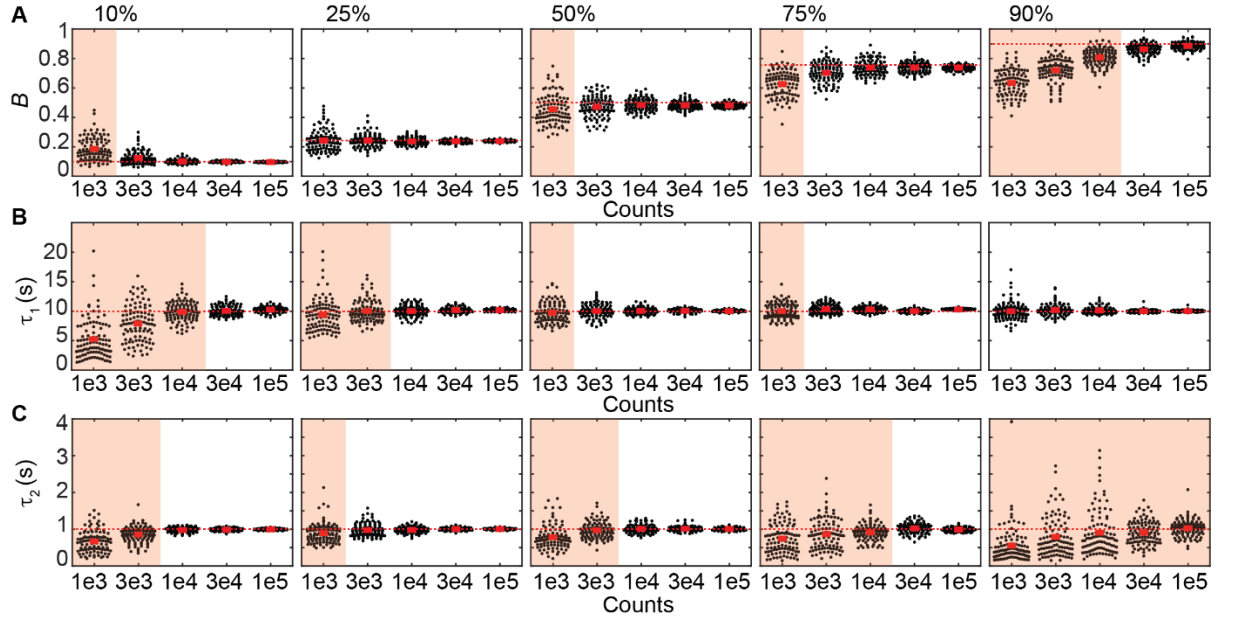

**Figure S4.** Determination of time constants and amplitudes from bi-exponential distributions with an intermediate rate ( $k_{\text{off}1}$ ) and a fast rate ( $k_{\text{off}2} = 10k_{\text{off}1}$ ). (A-C) Scatter plots show distributions of  $B$ ,  $\tau_1$  and  $\tau_2$  obtained using global fitting from 100 simulated distributions for each  $n$  value. Each panel corresponds to a pre-set  $B$ , which increases from 10%, 25%, 50%, 75% to 90% from left to right. In each panel,  $n$  increases from  $10^3$  (1e3) to  $10^5$  (1e5). Dashed lines and red bars represent the true values and the average respectively. Orange shades represent distributions where  $\sigma_B$  is larger than 0.1 or  $\sigma_\tau/\tau$  is larger than 20%. To enhance visibility, outliers (less than 5% when present) were omitted from scatter plots.

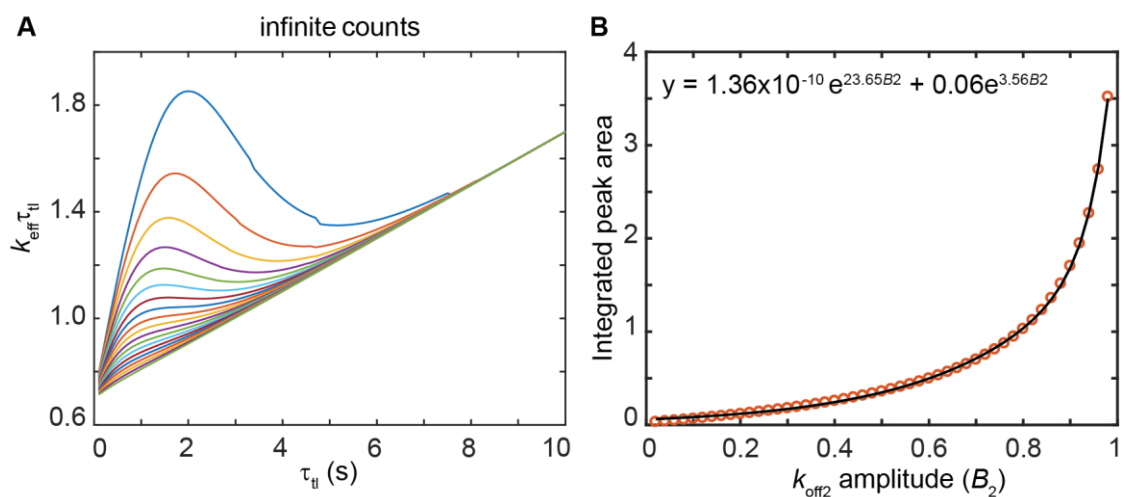

**Figure S5.** Bi-exponential distributions with an intermediate rate ( $k_{\text{off}1} = 0.1 \text{ s}^{-1}$ ) and a fast rate ( $k_{\text{off}2} = 1 \text{ s}^{-1}$ ) with infinite counts. (A) Representative  $k_{\text{eff}}\tau_{\text{tl}}$  plots at 20 amplitudes of  $k_{\text{off}2}$ . From top to bottom, the amplitude reduces from 95% to 5%. (B) Integrated peak areas as a function of  $k_{\text{off}2}$  amplitudes (open circles). Line is the exponential fit to data points ( $R^2: 0.9996$ ). The peak area is calculated as the difference between areas under the  $k_{\text{eff}}\tau_{\text{tl}}$  plots and the area under the line  $y = 0.7 + 0.1\tau_{\text{tl}}$ .

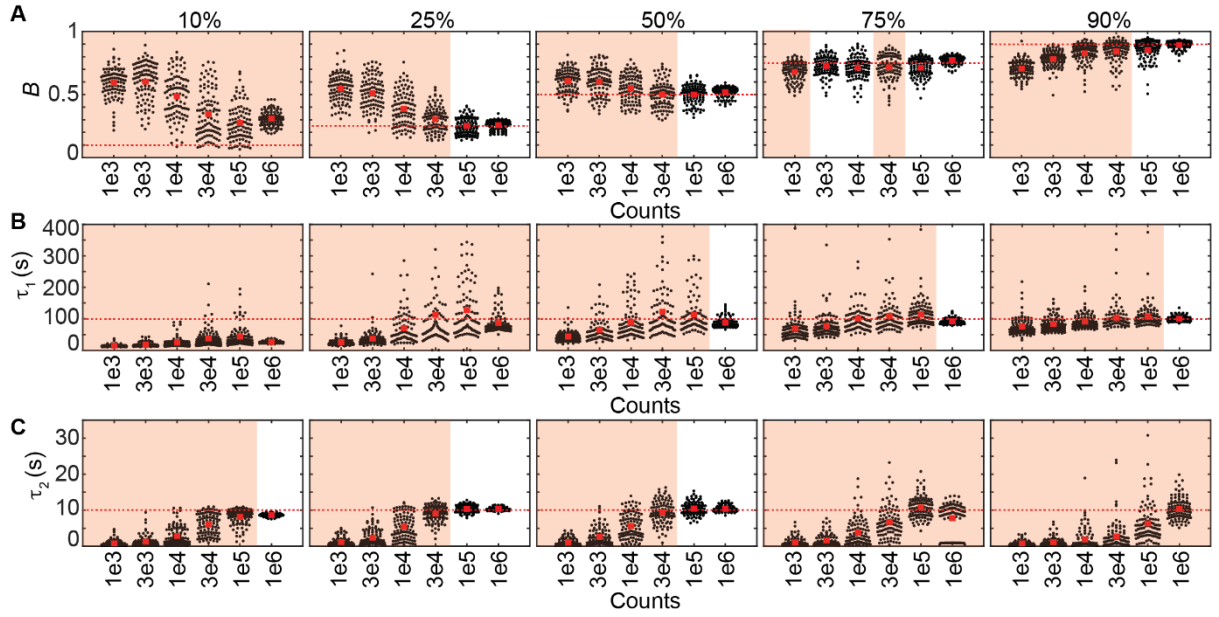

**Figure S6.** Determination of time constants and amplitudes from bi-exponential distributions with a slow rate ( $k_{\text{off}1} = 0.01 \text{ s}^{-1}$ ) and an intermediate rate ( $k_{\text{off}2} = 0.1 \text{ s}^{-1}$ ). (A-C) Scatter plots show distributions of  $B$ ,  $\tau_1$  and  $\tau_2$  obtained from fitting of 100 simulated distributions to bi-exponential model. Each panel corresponds to a pre-set amplitude of  $B$ , which increases from 10%, 25%, 50%, 75% to 90% from left to right. In each panel,  $n$  increases from  $10^3$  (1e3) to  $10^6$  (1e6). Dashed lines and red bars represent the true values and the average respectively. Orange shades represent distributions where  $\sigma_B$  is larger than 0.1 or  $\sigma_\tau/\tau$  is larger than 20%. To enhance visibility, outliers (less than 5% when present) were omitted from scatter plots.

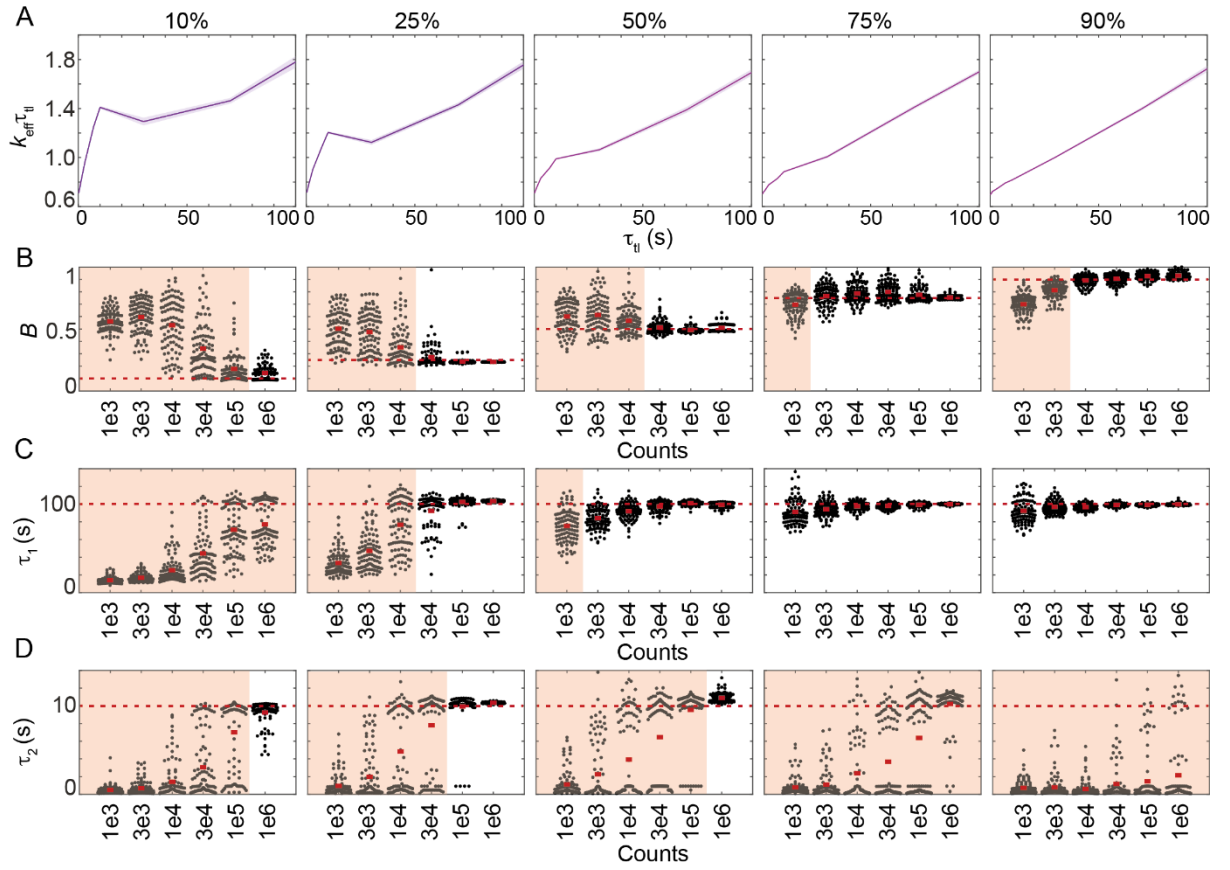

**Figure S7.** Determination of time constants and amplitudes from bi-exponential distributions with a slow rate ( $k_{\text{off}1}$ ) and an intermediate rate ( $k_{\text{off}2} = 10k_{\text{off}1}$ ), simulated using the 100-s  $\tau_{\text{ii}}$  set. (A)  $k_{\text{eff}}\tau_{\text{ii}}$  plots of bi-exponential distributions with  $k_{\text{b}\tau_{\text{int}}}$  of 0.7,  $k_{\text{off}1}$  and  $k_{\text{off}2}$  of 0.01 and 0.1  $\text{s}^{-1}$  respectively, with  $10^5$  observations. The amplitude of  $k_{\text{off}1}$  ( $B$ , shown on top) increases from left to right (10% to 90%). Shaded error bands are standard deviations from ten bootstrapped samples. (B-D) Scatter plots show distributions of  $B$ ,  $\tau_1$  and  $\tau_2$  obtained from fitting of 100 simulated distributions to bi-exponential model. Each panel corresponds to a pre-set amplitude of  $B$ , which increases from 10%, 25%, 50%, 75% to 90% from left to right. In each panel,  $n$  increases from  $10^3$  (1e3) to  $10^6$  (1e6). Dashed lines and red bars represent the true values and the average respectively. Orange shades represent distributions where  $\sigma_B$  is larger than 0.1 or  $\sigma_{\tau}/\tau$  is larger than 20%. To enhance visibility, outliers (less than 5% when present) were omitted from scatter plots.

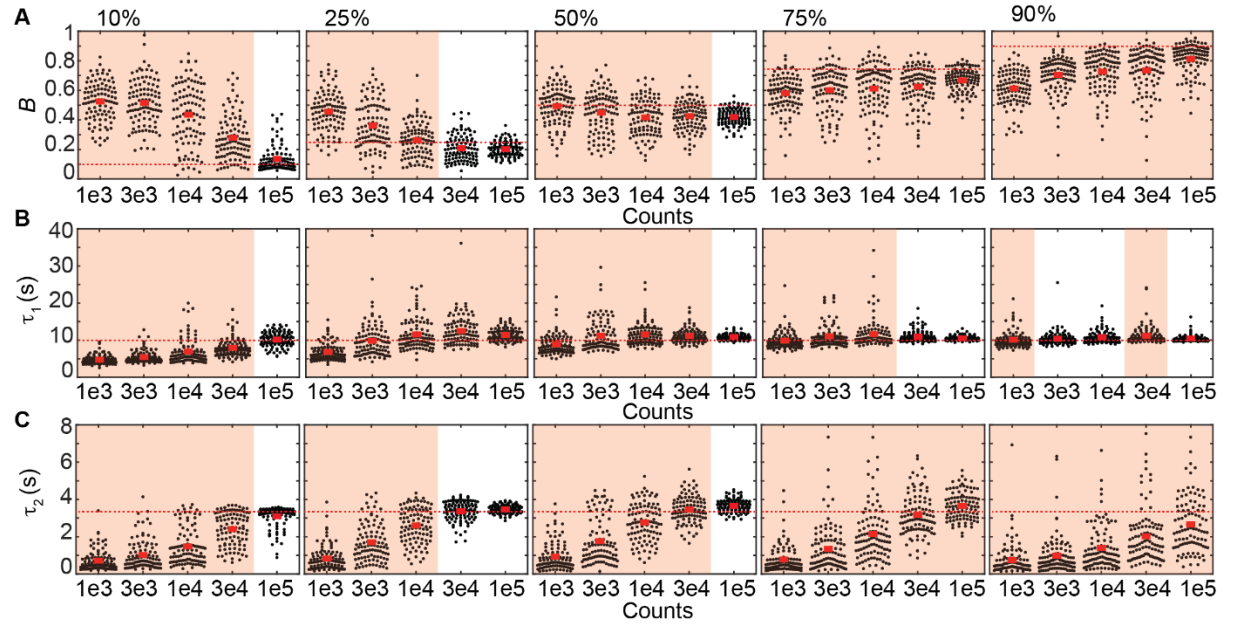

**Figure S8.** Determination of binding lifetimes and amplitudes from bi-exponential distributions with closely spaced rates ( $k_{\text{off}2} = 3k_{\text{off}1}$ ). (A-C) Scatter plots show distributions of  $B$ ,  $\tau_1$  and  $\tau_2$  obtained from fitting of 100 simulated distributions for each  $n$  value. Each panel corresponds to a pre-set  $B$ , which increases from 10%, 25%, 50%, 75% to 90% from left to right. In each panel,  $n$  increases from  $10^3$  (1e3) to  $10^5$  (1e5). Dashed lines and red bars represent the true values and the average respectively. Orange shades represent distributions where  $\sigma_B$  is larger than 0.1 or  $\sigma_\tau/\tau$  is larger than 20%. To enhance visibility, outliers (less than 5% when present) were omitted from scatter plots.

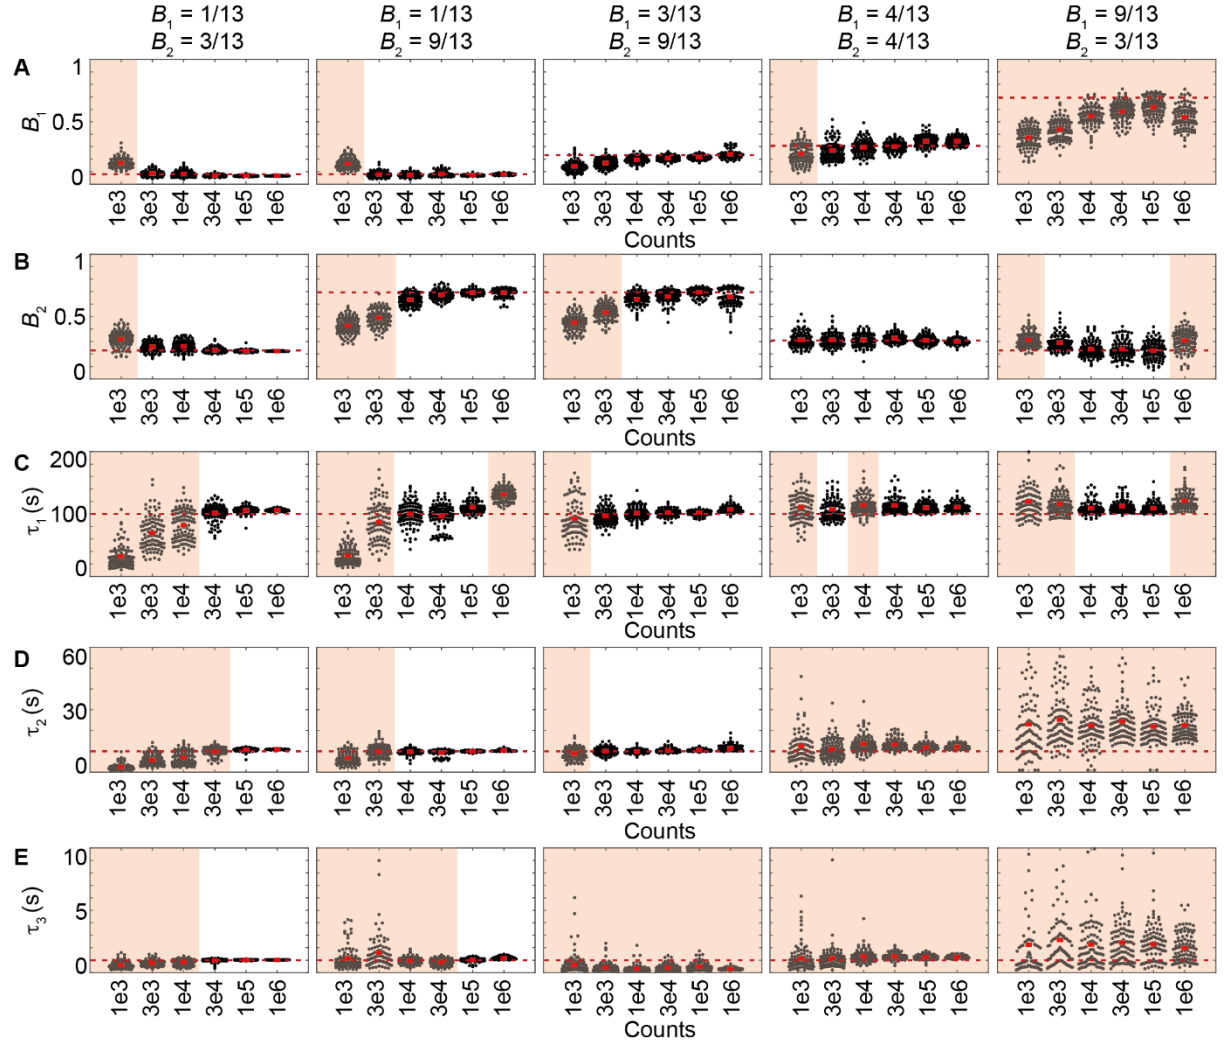

**Figure S9.** Determination of binding lifetimes and amplitudes from tri-exponential distributions with a slow rate ( $k_{\text{off}1}$ ), an intermediate rate ( $k_{\text{off}2} = 10k_{\text{off}1}$ ) and a fast rate ( $k_{\text{off}3} = 10k_{\text{off}2}$ ), using the 100-s  $\tau_{\text{II}}$  set. From left to right, five panels in each row correspond to different amplitudes of each sub-population (displayed on top). (A-E) Scatter plots show distributions of amplitudes ( $B_1$  and  $B_2$ ),  $\tau_1$ ,  $\tau_2$  and  $\tau_3$  obtained using global fitting 100 simulated samples. In each panel,  $n$  increases from  $10^3$  (1e3) to  $10^6$  (1e6). Dashed lines and red bars represent the true values and the averages respectively. Orange shades represent distributions where  $\sigma_B$  is larger than 0.1 or  $\sigma_{\tau}/\tau$  is larger than 20%. To enhance visibility, outliers (less than 5% when present) were omitted from scatter plots.

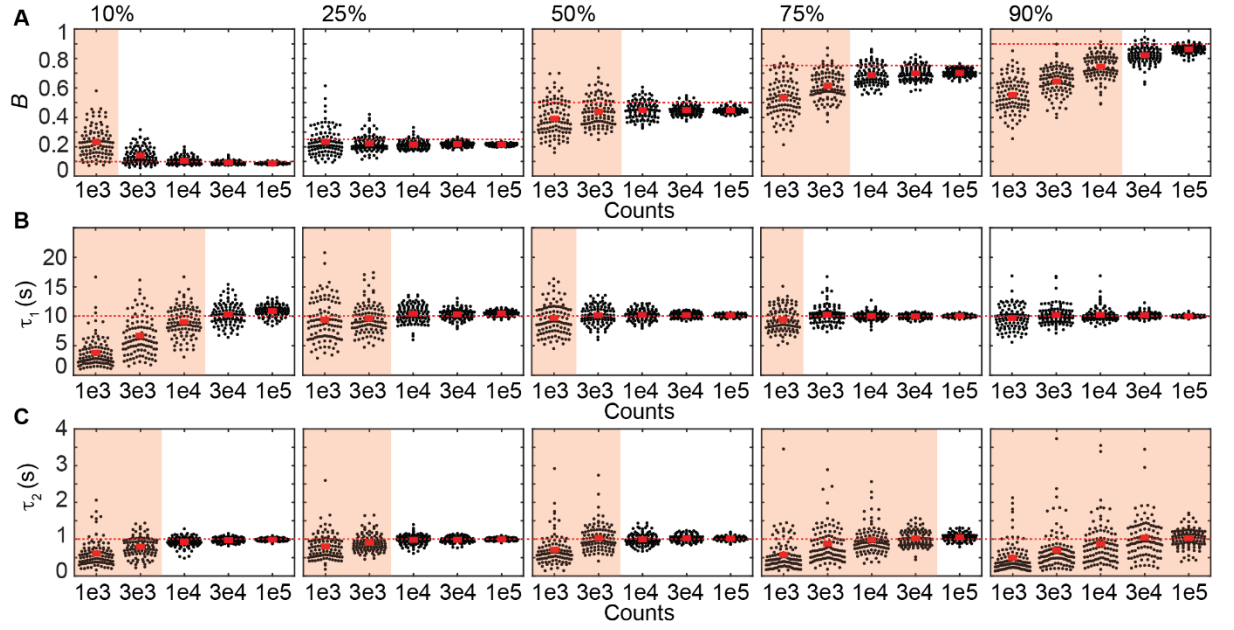

**Figure S10.** Determination of time constants and amplitudes from bi-exponential distributions simulated with the five  $\tau_{il}$  set, and an intermediate rate ( $k_{off1} = 0.1 \text{ s}^{-1}$ ) and a fast rate ( $k_{off2} = 1 \text{ s}^{-1}$ ). (A-C) Scatter plots show distributions of  $B$ ,  $\tau_1$  and  $\tau_2$  obtained from fitting of 100 simulated distributions to bi-exponential model. Each panel corresponds to a pre-set amplitude of  $B$ , which increases from 10%, 25%, 50%, 75% to 90% from left to right. In each panel,  $n$  increases from  $10^3$  (1e3) to  $10^5$  (1e5). Dashed lines and red bars represent the true values and the average respectively. Orange shades represent distributions where  $\sigma_B$  is larger than 0.1 or  $\sigma_\tau/\tau$  is larger than 20%. To enhance visibility, outliers (less than 5% when present) were omitted from scatter plots.

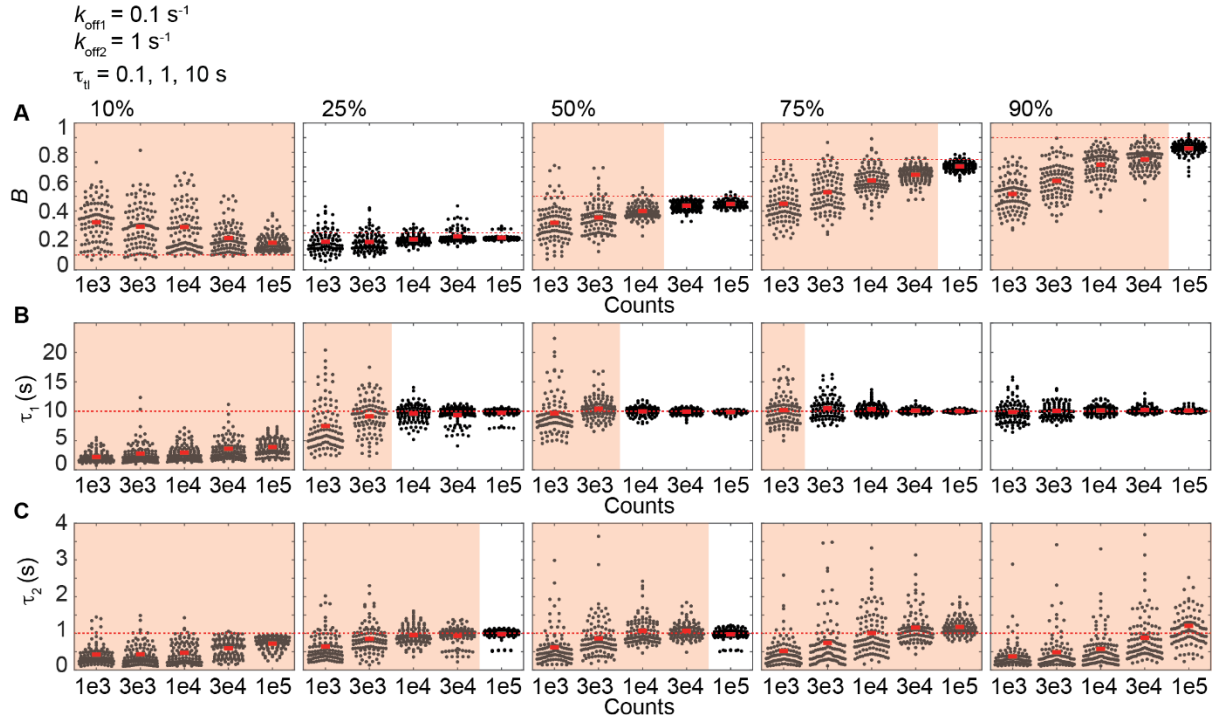

**Figure S11.** Determination of time constants and amplitudes from bi-exponential distributions simulated with the three  $\tau_{\text{off}}$  set, and an intermediate rate ( $k_{\text{off1}} = 0.1 \text{ s}^{-1}$ ) and a fast rate ( $k_{\text{off2}} = 1 \text{ s}^{-1}$ ). (A-C) Scatter plots show distributions of  $B$ ,  $\tau_1$  and  $\tau_2$  obtained from fitting of 100 simulated distributions to bi-exponential model. Each panel corresponds to a pre-set amplitude of  $B$ , which increases from 10%, 25%, 50%, 75% to 90% from left to right. In each panel,  $n$  increases from  $10^3$  (1e3) to  $10^5$  (1e5). Dashed lines and red bars represent the true values and the average respectively. Orange shades represent distributions where  $\sigma_B$  is larger than 0.1 or  $\sigma_{\tau}/\tau$  is larger than 20%. To enhance visibility, outliers (less than 5% when present) were omitted from scatter plots.

## Supplementary Notes

### 1. Simulation of a set of binding events whose lifetimes follow an exponential distribution with user-defined mean

```
function [counts, each_molecule] = simulate_res_time(mu,edges,n_count)
%%%%%%%%%%%%%%%%%%%%%%%%%%%%%%%%%%%%%%%%%%%%%%%%%%%%%%%%%%%%%%%%%%%%%%%%
%% Inputs:
%%     mu: mean of exponential distribution for a particular  $\tau_{t1}$ 
%%     edges: bin edges of histograms
%%     n_count: the number of counts for a particular  $\tau_{t1}$ 
%% Outputs:
%%     counts: vector describing CRTD
%%     each_molecule: vector containing all random number corresponding to
%%                     lifetimes of binding events
%%%%%%%%%%%%%%%%%%%%%%%%%%%%%%%%%%%%%%%%%%%%%%%%%%%%%%%%%%%%%%%%%%%%%%%%
each_molecule = [];
counts = zeros(10,1);
%% generate a set of random numbers corresponding to lifetimes of binding
%% events until counts in the first bin exceed user-defined counts
while counts(1) < n_count
% single iteration of the exprnd function
    sim = exprnd(mu,round(n_count/2.71),1);
% construct the histogram with edges corresponding to frame times
% N is a vector containing counts in all bins [from the latest iteration]
    [N,~] = histcounts(sim,edges);
    counts = counts + N'; % add counts to the previous iterations
% combine lifetimes of binding events to existing population from previous
% iteration of the exprnd function
    each_molecule = [each_molecule; sim];
end
end % end of the function
```

## 2. Simulation of mono-, bi- or tri-exponential distribution across all $\tau_{ij}$

```

%%%%%%%%%%%%%%%%%%%%%%%%%%%%%%%%%%%%%%%%%%%%%%%%%%%%%%%%%%%%%%%%%%%%%%%%
%% Inputs:
%%   ttl:    vector containing the set of time-lapse intervals
%%   kb:     photobleaching rate (unit: s-1)
%%   tint:   camera integration time
%%   koff1:  user-defined off rate 1
%%   koff2:  user-defined off rate 2
%%   koff3:  user-defined off rate 3
%%   B(1):   amplitude of the first kinetic sub-population
%%   B(2):   amplitude of the second kinetic sub-population
%%   n_count_total: user-defined counts for each simulation
%% Outputs:
%%   bin: matrix containing CRTDs for all time-lapse intervals
%%   d.data: contains the simulated population at a particular time-
%%   lapse interval
%%%%%%%%%%%%%%%%%%%%%%%%%%%%%%%%%%%%%%%%%%%%%%%%%%%%%%%%%%%%%%%%%%%%%%%%
for i = 1:length(ttl) % simulate CRTD for each time-lapse interval
    time = ttl(i)*(0:10)'; % determine frame times for binning
    %% define exponential distribution for each sub-population
    keff1 = (kb*tint/ttl(i) + koff1); % effective rate 1
    % mean of the exponential distribution of the first sub-population
    mu1 = 1/keff1;
    keff2 = (kb*tint/ttl(i) + koff2); % effective rate 2
    % mean of the exponential distribution of the second sub-population
    mu2 = 1/keff2;
    keff3 = (kb*tint/ttl(i) + koff3); % effective rate 3
    % mean of the exponential distribution of the third sub-population
    mu3 = 1/keff3;
    %% determine the number of counts for each sub-population based
    %% on the amplitudes B1 and B2
    % counts of the first kinetic sub-population
    n_count1 = round(B(1)*n_count_total);
    % counts of the second kinetic sub-population
    n_count2 = round(B(2)*n_count_total);
    % counts of the third kinetic sub-population
    n_count3 = n_count_total - n_count1 - n_count2;
    % bin1, bin2 and bin3 are vectors containing CRTDs of koff1, koff2 and
    % koff3 sub-population respectively
    % population1, population2 and population3 are vectors containing
    % simulated koff1, koff2 and koff3 sub-population respectively.
    bin2 = zeros(10,1); population2 = [];
    bin3 = zeros(10,1); population3 = [];
    % simulate koff1 sub-population
    [bin1, population1] = simulate_res_time(mu1,time,n_count1);
    % simulate koff2 sub-population
    if n_count2 > 1
        [bin2, population2] = simulate_res_time(mu2,time,n_count2);
    end
    % simulate koff3 sub-population
    if n_count3 > 1
        [bin3, population3] = simulate_res_time(mu3,time,n_count3);
    end
    % combine CRTDs from sub-population CRTDs
    bin(:,i) = bin1 + bin2 + bin3;
    % combine simulated population from simulated sub-populations
    d(i).data = [population1; population2; population3];
end

```

### 3. Global fitting

```
function [p_out] = globalFit(i_model, X, Y, tint)
%%%%%%%%%%%%%%%%%%%%%%%%%%%%%%%%%%%%%%%%%%%%%%%%%%%%%%%%%%%%%%%%%%%%%%%%
%% Inputs:
%%     i_model = 1 - mono-exponential model
%%     i_model = 2 - bi-exponential model
%%     i_model = 3 - tri-exponential model
%%     X: matrix containing frame times of all time-lapse intervals
%%         - row: frame times corresponding to one time-lapse interval
%%         - column: increase in frame times
%%     Y: matrix containing simulated CRTDs of all time-lapse intervals
%%     tint: camera integration time
%%     para: initial conditions
%%         - mono-exponential model: [kb, koff1, counts]
%%         - bi-exponential model: [kb, koff1, B1, koff2, counts]
%%         - tri-exponential model: [kb, koff1, B1, koff2, B2, koff3, counts]
%%     lb: lower constraints
%%         - mono-exponential model: [kb, koff1, counts]
%%         - bi-exponential model: [kb, koff1, B1, koff2, counts]
%%         - tri-exponential model: [kb, koff1, B1, koff2, B2, koff3, counts]
%%     ub: upper constraints
%%         - mono-exponential model: [kb, koff1, counts]
%%         - bi-exponential model: [kb, koff1, B1, koff2, counts]
%%         - tri-exponential model: [kb, koff1, B1, koff2, B2, koff3, counts]
%% Outputs:
%%     p_out: vector containing outcomes of global fitting
%%         - p(1): kb
%%         - p(2): koff1
%%         - p(3): B1
%%         - p(4): koff2
%%         - p(5): B2
%%         - p(6): koff3
%%         - p(7): 1 - B1 - B2
%%         - p(8)-p(end): counts at time 0 for all time-lapse intervals
%%%%%%%%%%%%%%%%%%%%%%%%%%%%%%%%%%%%%%%%%%%%%%%%%%%%%%%%%%%%%%%%%%%%%%%%
%% Known Parameters
ttl = X(:,1); % vector containing all time-lapse intervals
a_para = Y(:,1); % Initialize the vector for counts at time 0
weights = ones(size(X)); % fitting weights
lower_B = 1/min(a_para(a_para>0)); % the lower bound for the amplitudes
upper_koff = 1/tint; % the upper bound for off rates
if i_model == 1 % fitting to mono-exponential function
    para = [1, 1, a_para']; % initial conditions: kb, koff1, counts
    lb = [0, 0, zeros(size(ttl))']; % lower bounds: kb, koff1, counts
    % upper bounds: kb, koff1, counts
    ub = [Inf, upper_koff, Inf*ones(size(ttl))'];
    % define function to minimize
    f1 = @(p) (model(i_model,p,X,tint,ttl)-Y).*weights );
    opts = optimset('Display','off');
    % Global fitting using the lsqnonlin function
    [p] = lsqnonlin(f1,para,lb,ub,opts);
    p_out = [p(1:2),1,zeros(1,4),p(3:end)];
elseif i_model == 2 % fitting to bi-exponential function
    para = [1, 1, 0.5, 2, a_para'];
    lb = [0, 1e-3, lower_B, 1e-3, zeros(size(ttl))'];
    ub = [Inf, upper_koff, 1-lower_B, upper_koff, Inf*ones(size(ttl))'];
    % define function to minimize
    f1 = @(p) (model(i_model,p,X,tint,ttl)-Y).*weights );
    opts = optimset('Display','off');
```

```

% Global fitting using the lsqnonlin function
[p] = lsqnonlin(f1,para,lb,ub,opts);
% assign the smaller off rate to be koff1
p_temp = sortrows([p(2) p(3); p(4) (1 - p(3))]);
p_temp = p_temp';
p_out = [p(1), p_temp(:)', zeros(1,2), p(5:end)];
elseif i_model == 3
para = [1, 0.05, 0.3, 0.5, 0.3, 5, a_para'];
lb = [0, 1e-3, lower_B, 1e-3, lower_B, 1e-3, zeros(size(ttl))'];
ub = [Inf, upper_koff, 1-lower_B, upper_koff, 1-lower_B, upper_koff,
      Inf*ones(size(ttl))'];
% define function to minimize
f1 = @(p) ( sum(sum((model(i_model,p,X,tint,ttl)-Y).^2.*weights,2) ));
opts = optimoptions('fmincon', 'MaxFunctionEvaluations',10000,...
                    'MaxIter',3000,'Algorithm','interior-point','StepTolerance',
                    1.0000e-9);
b = 1-2*lower_B;
A = [0,0,1,0,1,0,zeros(1,size(a_para,1))];
% Global fitting using the fmincon function
[p] = fmincon(f1,para,A,b,[],[],lb,ub,[],opts);
% assign the smallest off rate to be koff1 and the second smallest to
% be koff2
p_temp = sortrows([p(2) p(3); p(4) p(5); p(6) (1-p(3)-p(5))]);
p_temp = p_temp';
p_out = [p(1),p_temp(:)',p(7:end)];
end
end % end of function

```

#### 4. Define fitting models

```

function f = model(i_model,para,X,tint,ttl)
%%%%%%%%%%%%%%%%%%%%%%%%%%%%%%%%%%%%%%%%%%%%%%%%%%%%%%%%%%%%%%%%%%%%%%%%
%% Inputs:
%%   i_model = 1 - mono-exponential model
%%   i_model = 2 - bi-exponential model
%%   i_model = 3 - tri-exponential model
%%   para: global parameters
%%   X:     frame times
%%   tint: camera integration times
%%   ttl: time-lapse time
%%%%%%%%%%%%%%%%%%%%%%%%%%%%%%%%%%%%%%%%%%%%%%%%%%%%%%%%%%%%%%%%%%%%%%%%
% ampl: vector containing counts for all time-lapse intervals
p = tint./ttl; p = p(:);
if i_model == 1
    kb = para(1);
    koff1 = para(2);
    ampl = para(3:end);
    % mono-exponential model
    f = (ampl'*ones(1,size(X,2))).*(
        exp(-((kb.*p + koff1)*ones(1,size(X,2))).*X));
elseif i_model == 2 % bi-exponential model
    kb = para(1);
    koff1 = para(2);
    B1 = para(3);
    koff2 = para(4);
    ampl = para(5:end);
    % bi-exponential model
    f = (ampl'*ones(1,size(X,2))).*(B1.*exp(-((kb.*p + koff1)*
        ones(1,size(X,2))).*X)+(1-B1).*exp(-((kb.*p + koff2)*
        ones(1,size(X,2))).*X));

```

```

elseif i_model == 3
    kb = para(1);
    koff1 = para(2);    B1 = para(3);
    koff2 = para(4);    B2 = para(5);
    koff3 = para(6);
    ampl = para(7:end);
    % tri-exponential model
    f = (ampl'*ones(1,size(X,2))).*
        (B1.*exp(-((kb.*p + koff1) * ones(1,size(X,2))).*X)
        + B2.* exp( -(kb.*p + koff2)*ones(1,size(X,2)).*X )+
        (1-B1-B2).* exp( -(kb.*p + koff3)*ones(1,size(X,2)).*X ));
end
end % end of function

```
