# Supplementary material
Source: PubMed Central journal article supplement (PMC6731377)
Supplement: mmc2.pdf [file mmc2.pdf]

# Identification of Multiple Kinetic Populations of DNA-Binding Proteins in Live Cells

Han N. Ho,<sup>1,2</sup> Daniel Zalami,<sup>3</sup> Jürgen Köhler,<sup>3,4,5</sup> Antoine M. van Oijen,<sup>1,2,\*</sup> and Harshad Ghodke<sup>1,2,\*</sup>

<sup>1</sup>Molecular Horizons and School of Chemistry and Molecular Bioscience, University of Wollongong, Wollongong, Australia; <sup>2</sup>Illawarra Health and Medical Research Institute, Wollongong, Australia; <sup>3</sup>Spectroscopy of Soft Matter, University of Bayreuth, Bayreuth, Germany; <sup>4</sup>Bavarian Polymer Institute, Bayreuth, Germany; and <sup>5</sup>Bayreuth Institute of Macromolecular Research, University of Bayreuth, Bayreuth, Germany

**ABSTRACT** Understanding how multiprotein complexes function in cells requires detailed quantitative understanding of their association and dissociation kinetics. Analysis of the heterogeneity of binding lifetimes enables the interrogation of the various intermediate states formed during the reaction. Single-molecule fluorescence imaging permits the measurement of reaction kinetics inside living organisms with minimal perturbation. However, poor photophysical properties of fluorescent probes limit the dynamic range and accuracy of measurements of off rates in live cells. Time-lapse single-molecule fluorescence imaging can partially overcome the limits of photobleaching; however, limitations of this technique remain uncharacterized. Here, we present a structured analysis of which timescales are most accessible using the time-lapse imaging approach and explore uncertainties in determining kinetic subpopulations. We demonstrate the effect of shot noise on the precision of the measurements as well as the resolution and dynamic range limits that are inherent to the method. Our work provides a convenient implementation to determine theoretical errors from measurements and to support interpretation of experimental data.

**SIGNIFICANCE** Measuring lifetimes of interactions between DNA-binding proteins and their substrates is important for understanding how they function in cells. In principle, time-lapse imaging of fluorescently tagged proteins using single-molecule methods can be used to identify multiple subpopulations of DNA-binding proteins and determine binding lifetimes lasting for several tens of minutes. Despite this potential, currently available guidelines for the selection of binding models are unreliable, and the practical implementation of this approach is limited. Here, using experimental and simulated data, we identify the minimal size of the data set required to resolve multiple populations reliably and measure binding lifetimes with desired accuracy. This work serves to provide a guide to data collection and measurement of DNA-binding lifetimes from single-molecule time-lapse imaging data.

## INTRODUCTION

Understanding fundamental processes of life requires the characterization of the kinetics of interactions between biological molecules. At single-molecule levels, these systems often exhibit kinetic heterogeneity that is inherent to the presence of multiple intermediate states (1–17). Advances in single-molecule imaging have enabled the detection and characterization of heterogeneous subpopulations in reactions conducted in vitro as well as in vivo. Ultimately, these investigations enable the construction of detailed molecular

mechanisms to explain how various biomolecular interactions proceed.

Compared to in vitro studies, live-cell investigations offer the key advantage of studying biochemical reactions at physiological conditions that can be difficult to reconstitute. Single-molecule live-cell imaging commonly relies on fluorescent proteins that are genetically fused to the protein of interest (Fig. 1 A; (18–22)). Tracking the fluorescence signal of thousands of molecules, one molecule at a time, enables the building of physical models from which physical parameters such as diffusion constants and detachment rates from DNA can be determined. Where detachment rates are concerned, the trajectory lengths of thousands of molecules are aligned to obtain a cumulative residence time distribution (CRTD). At the single-molecule level, the dissociation of a protein from its substrate is a stochastic process. This phenomenon can be adequately described as a two-state

Submitted December 17, 2018, and accepted for publication July 8, 2019.

\*Correspondence: [vanoijen@uow.edu.au](mailto:vanoijen@uow.edu.au) or [harshad@uow.edu.au](mailto:harshad@uow.edu.au)

Han N. Ho's present address is The Francis Crick Institute, London, United Kingdom.

Editor: Gijs Wuite.

<https://doi.org/10.1016/j.bpj.2019.07.015>

© 2019 Biophysical Society.

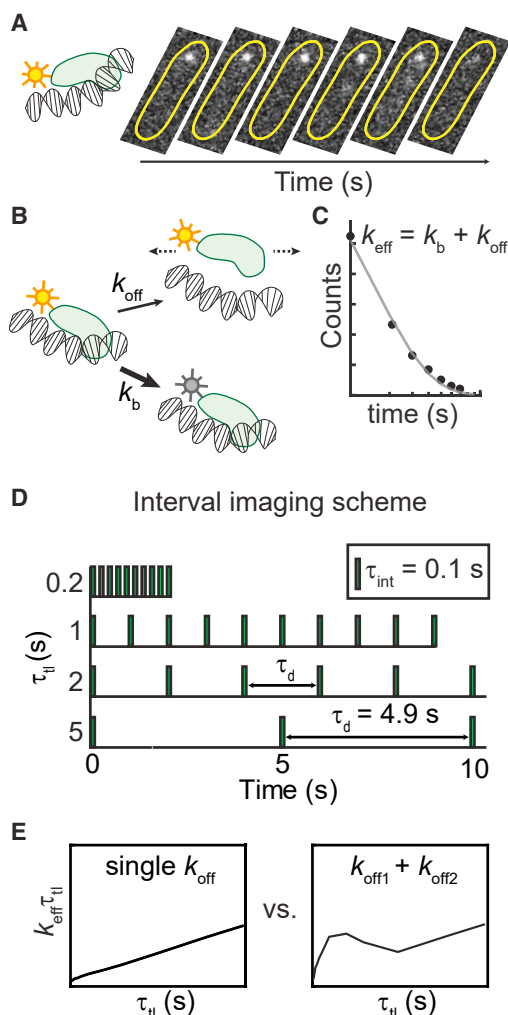

**FIGURE 1** Experimental approach for characterizing kinetic heterogeneity of protein binding in live cells using single-molecule fluorescence imaging. (A) The protein of interest is tagged with a fluorescent protein. When the protein binds to the DNA substrate, its fluorescence signal appears as a diffraction-limited focus that can be tracked in real time. Subsequent dissociation results in the disappearance of the focus and a redistribution of the fluorescence signal throughout the cell. Yellow outlines illustrate the bacterial cell membrane. (B) The loss of fluorescence is attributable to either dissociation or photobleaching of the chromophore. (C) Cumulative residence time distribution (CRTD) is constructed from binding durations of thousands of molecules. Fitting the exponential function (Eq. 1) to CRTD yields an effective rate  $k_{eff}$ , which is the sum of off rate ( $k_{off}$ ) of the protein of interest and photobleaching rate ( $k_b$ ) of the fluorescent probe (23). (D) To deconvolute  $k_b$  and  $k_{off}$ , excitation and integration durations ( $\tau_{int}$ ) can be spaced with various dark intervals ( $\tau_d$ ). (E) Through exponential analyses, CRTDs obtained at various intervals result in  $k_{eff}\tau_{til}$  plots, which are indicators of kinetic heterogeneity (23). A single kinetic population yields a straight line, whereas deviations from linear fits indicate the presence of a second kinetic subpopulation. For a single kinetic population, the slope is the off rate, and the y intercept is proportional to the photobleaching rate. To see this figure in color, go online.

kinetic model with the interconversion of populations being modeled as a Poisson process. The resulting CRTD can be fit to exponential functions to obtain decay rates. In the

case of a fluorescently tagged protein in which loss of fluorescence is attributable to either dissociation or photobleaching of the chromophore, the decay rate represents a combination of dissociation rates and photobleaching rate (Fig. 1, B and C; (23)).

Photobleaching, a result of fluorescent proteins being damaged upon exposure to excitation sources, leads to the loss of fluorescence signal (24). Under excitation conditions that guarantee good signal-to-background ratios, fluorescent proteins can only stay “on” for a few frames during continuous acquisitions. This limited visualization window reflects the “photon budget” (25). Thus, when photobleaching occurs faster than the dissociation process, lifetime measurements are limited by the photobleaching rate. To overcome this problem and extend the observation time, the observation time window can be expanded by temporally spacing the photon budget using stroboscopic imaging (26). In this method, a dark interval ( $\tau_d$ ) is inserted between integration time ( $\tau_{int}$ ), effectively scaling the observation time with a factor of  $\tau_{til}/\tau_{int}$  ( $\tau_{til} = \tau_{int} + \tau_d$ ). Instead of using one dark interval, Gebhardt and co-workers (23) developed an approach involving “time-lapse illumination with a fixed integration time, interspersed with dark periods of varying duration” in which fluorescence acquisitions are collected at a series of time-lapse intervals (Fig. 1 D; (23,27)). This method has also been variously referred to as “time-lapse imaging” (28), “time-lapse illumination with different dark times” (29), “time-lapse imaging at multiple time-scales” (30), and “stroboscopic single particle tracking PALM” (31). For the purpose of brevity and to distinguish from a time-lapse imaging mode with a single dark interval, we have adopted the term “interval imaging” in our lab (32). Briefly, the approach works as follows: first, several videos (each with a unique dark interval) are collected while keeping the photon budget constant (in practice, this is achieved by keeping the number of frames constant across all the videos). In cases in which the copy number of the tagged protein is high and single-molecule imaging conditions may be difficult to attain, the cellular fluorescence is first photobleached such that only single-molecule fluorescence is observable. Subsequently, using particle tracking algorithms that enable measurements of lifetimes of bound molecules within a specified localization radius, a CRTD can be compiled. Fitting the CRTDs to effective rates ( $k_{eff}$ ), one can obtain the so-called  $k_{eff}\tau_{til}$  plot, which is linear for monoexponential distributions (Fig. 1 E; (23)). In this case, because the photobleaching rate is maintained constant across all conditions, it can be read off from the intercept on the y axis. A population of molecules dissociating with a finite and measurable off rate manifests as a straight line, in which the slope reports on the off rate of the dissociation kinetics. A mixed population composed of species dissociating with multiple lifetimes manifests as a deviation from the linear fit (Fig. 1 E; (23)). Fitting the experimental data to a model describing mixed populations can then be used to extract the

relative amplitudes and rates of the various populations. This power to deconvolute the photobleaching rate from multiple off rates has been successfully harnessed to dissect the kinetic heterogeneity of various DNA-binding proteins, including transcription factors and DNA replication and repair proteins in live cells (23,27–33).

However, limitations arising from the practical implementation of this elegant method remain uncharacterized. In particular, we address the following questions: 1) What is the minimal number of observations needed to determine the binding lifetime of a species within a specified confidence; 2) for a given experimental setup, what is the dynamic range in binding lifetimes that can be detected; 3) how many populations can be resolved; and 4) what limits the ability to reliably resolve multiple populations? We consider four cases below to answer these questions. This study serves to provide a practical guide to realize the power as well as limitations of practical implementations of the interval imaging approach to measure intracellular binding kinetics of fluorescently tagged proteins.

## METHODS

### Rationale and model

For an introduction to the method, we direct the reader to the seminal work by Gebhardt and co-workers who have developed and demonstrated the time-lapse imaging approach discussed here (23). Here, we first summarize the theoretical development to establish the context of the problem for this report. Consider a system containing “A” number of fluorescently tagged DNA-bound proteins, wherein the proteins dissociate from DNA with a single off rate ( $k_{\text{off}}$ ). Upon exposure to excitation photon sources, the fluorescent proteins exhibit photobleaching with a rate  $k_b$ , resulting in the loss of fluorescence signal. Additionally, dissociation contributes to the loss of fluorescent foci as protein molecules move out of the localization radius. Because dissociation and photobleaching are independent and both are Poisson processes, the loss of observations as a function of time  $t$  can be described as follows (23):

$$f_1(t) = A \exp(-(k_b + k_{\text{off}})t). \quad (1)$$

Observation times of genetically expressible fluorescent proteins are severely limited to the duration of a few acquisition frames because of photobleaching, which limits measurements of long-lived binding events (34). To extend observation times, the frame rate can be reduced by inserting a dark interval ( $\tau_d$ ) after a short integration time ( $\tau_{\text{int}}$ ). Scaling the photobleaching rate appropriately, Eq. 1 then becomes the following (23):

$$f_2(t) = A \exp(-(k_b \tau_{\text{int}}/\tau_{\text{tl}} + k_{\text{off}})t), \quad (2)$$

where the time-lapse time  $\tau_{\text{tl}}$  is the sum of  $\tau_{\text{int}}$  and  $\tau_d$ . The sum of two decay rates  $k_b$  and  $k_{\text{off}}$  can be approximated with an effective decay rate ( $k_{\text{eff}}$ ) (23):

$$k_{\text{eff}} = k_b \tau_{\text{int}}/\tau_{\text{tl}} + k_{\text{off}}. \quad (3)$$

The rearrangement of Eq. 3 yields the following (23):

$$k_{\text{eff}} \tau_{\text{tl}} = k_b \tau_{\text{int}} + k_{\text{off}} \tau_{\text{tl}}. \quad (4)$$

As  $k_b \tau_{\text{int}}$  is maintained constant at a certain imaging condition,  $k_{\text{eff}} \tau_{\text{tl}}$  increases linearly with  $\tau_{\text{tl}}$ , with the coefficient (slope)  $k_{\text{off}}$ .

In systems with two subpopulations each dissociating at different rates  $k_{\text{off}1}$  and  $k_{\text{off}2}$ , Eq. 2 then becomes the following (23):

$$f_3(t) = A(B \exp(-(k_b \tau_{\text{int}}/\tau_{\text{tl}} + k_{\text{off}1})t) + (1 - B) \exp(-(k_b \tau_{\text{int}}/\tau_{\text{tl}} + k_{\text{off}2})t)), \quad (5)$$

where  $B$  ( $0 < B < 1$ ) and  $(1 - B)$  are the amplitudes of  $k_{\text{off}1}$  and  $k_{\text{off}2}$  subpopulations, respectively.

Similarly, a system with three kinetic subpopulations can be described by the following (29):

$$f_4(t) = A(B_1 \exp(-(k_b \tau_{\text{int}}/\tau_{\text{tl}} + k_{\text{off}1})t) + B_2 \exp(-(k_b \tau_{\text{int}}/\tau_{\text{tl}} + k_{\text{off}2})t) + (1 - B_1 - B_2) \exp(-(k_b \tau_{\text{int}}/\tau_{\text{tl}} + k_{\text{off}3})t)), \quad (6)$$

where  $B_1, B_2$  ( $0 < B_1, B_2 < 1$  and  $B_1 + B_2 < 1$ ), and  $(1 - B_1 - B_2)$  represent the amplitudes of  $k_{\text{off}1}$ ,  $k_{\text{off}2}$ , and  $k_{\text{off}3}$  subpopulations, respectively.

## Experimental considerations

The specifics of the experimental setup for different model organisms should be tailored to requirements for the respective system. However, to provide the reader with a starting point, we describe the experimental configuration used in our lab to measure binding lifetimes of DNA repair proteins labeled with the fluorescent protein, YPet, in the model organism *Escherichia coli* (see Fig. S1; (32)). Bacterial cells (MG1655 cells carrying *mfd*-YPet in place of *mfd*) in the early exponential phase are loaded into a custom-built flow cell made up of a glass coverslip and a quartz top. The bottom coverslip is functionalized with (3-Aminopropyl)triethoxysilane (Alfa Aesar, Haverhill, MA) to facilitate cell adhesion to the surface of the coverslip. The temperature of the flow cell is kept constant at 30°C. Cells are supplied with aerated rich-defined media (EZ rich-defined medium supplemented with glucose; Teknova, Hollister) to maintain fast growth. YPet is excited with 514-nm laser (Sapphire LP laser; Coherent, Santa Clara, CA) in near-total internal reflection fluorescence configuration (35) at a power density of 71 W/cm<sup>2</sup> (measured directly above the inverted objective). Fluorescent signal is recorded using an electron-multiplying-CCD camera (Photometrics Evolve; Teledyne Photometrics, Tucson, AZ), with an electron-multiplying gain of 1000. The camera exposure time is 0.1 s, and time-lapse imaging is acquired with a 10-s  $\tau_{\text{tl}}$  set (Table S2). Typically, a time-lapse imaging experiment lasts 3–5 h and in generally 4–10 experiments are required to obtain more than 1000 binding events at each  $\tau_{\text{tl}}$ .

Resolution of binding events in bacterial cells expressing copy numbers of fluorescent proteins in excess of ~20 copies per cell is challenging because of the limitations of particle tracking algorithms to resolve closely spaced foci. Further, distinguishing bound molecules from freely diffusive molecules in the cytosol is also challenging when copy numbers are high. In this case, to enable the reliable observation of single molecules, cells are exposed to continuous illumination such that the majority of the emitters are darkened or photobleached, and only stochastically reactivated emitters are observed in single-molecule imaging conditions (36).

This setup allows us to unambiguously detect single-molecule foci using a relative signal-to-background ratio between six and eight. Foci detected in at least two consecutive frames within a 300-nm (three pixels) radius are defined as a binding event. For each  $\tau_{\text{tl}}$ , all binding events are combined, and bootstrapping analysis is performed by randomly selecting with replacements 80% of all binding events. CRTDs are constructed from bootstrapped samples and are fit to exponential models to obtain  $k_{\text{eff}} \tau_{\text{tl}}$  plots as well as  $k_b$  and  $\tau$ .

## Simulating concurrent dissociation and photobleaching

To maintain full control of the kinetic variables, we chose to perform simulations of the experiment. Simulations of exponential distributions and curve-fitting were performed with a custom-written program in MATLAB (The MathWorks, Natick, MA). We simulated exponential distributions (Eqs. 2, 5, and 6) using the *exprnd* function in MATLAB (Supporting Materials and Methods). This function generates exponentially distributed random numbers with a specified decay constant. Here, each number returned by *exprnd* function represents the lifetime of a simulated “trajectory.” For the purposes of this work, we have not accounted for blinking of bound molecules that may yield prematurely truncated binding events. Accommodation of such a feature will require reasonable estimates of FP blinking under the conditions of the experiment that will be unique to the fluorescent probe used. To simulate a subpopulation of molecules dissociating with a specified off rate, a set of trajectories was generated and binned to produce histograms with 10 bins whose edges correspond to frame times (integer multiples of  $\tau_{\text{tl}}$ ). The *exprnd* function was iterated until the counts of the first bin exceeded the number of binding events in that subpopulation (typically between three and six iterations, see Fig. S2). To simulate experiments in which multiple subpopulations are present, each subpopulation was simulated in defined proportions, and all trajectories were pooled together. Finally, to generate the CRTDs, we rejected molecules in the first bin (0 to  $\tau_{\text{tl}}$ ) and only carried forward observations from  $\tau_{\text{tl}}$  to  $10\tau_{\text{tl}}$  to the next step in accordance with our definition of a binding event (or trajectories) (i.e., the observation must be present in two consecutive frames).

To simulate uncertainty in each simulation sample, 10 rounds of bootstrapping were performed, each involved in randomly sampling 80% of the simulated population. Next, fitting was performed on each bootstrapped CRTD (henceforth referred simply as CRTDs). First, the CRTD at each  $\tau_{\text{tl}}$  was fit to a monoexponential model to obtain  $k_{\text{eff}}$  (Eqs. 2 and 3; Fig. 1 C). These values for  $k_{\text{eff}}$ , corresponding to the number of  $\tau_{\text{tl}}$ , were then used to construct the  $k_{\text{eff}}\tau_{\text{tl}}$  plot. Error bands in these plots represent SDs from 10 bootstrapped samples.

Second, the CRTDs for all  $\tau_{\text{tl}}$  were fit to objective functions based on Eqs. 2, 5, and 6 (global fitting, see Supporting Materials and Methods). The list of parameters, initial conditions, bound constraints, termination criteria, and algorithm is presented in Table S1. Throughout the article,  $A$  was set as a local parameter to mimic experimental conditions in which counts may be different across  $\tau_{\text{tl}}$ , even though this often leads to less accurate results compared to when  $A$  was set as a global parameter (Fig. S3, B and C).

For each simulation, outcomes from globally fitting the 10 bootstrapped CRTDs were averaged and reported. To determine uncertainty in the estimate, we repeated the simulation 100 times. The SDs of the binding lifetime ( $\sigma_\tau$ ) from 100 simulations using the same conditions was calculated according to Eq. 7:

$$\sigma_\tau = \left( \sum_{i=1}^{100} (\tau_i - \langle \tau \rangle)^2 / 100 \right)^{1/2}, \quad (7)$$

where  $\langle \tau \rangle$  denotes the true binding lifetime, which is calculated by  $1/\langle k_{\text{off}} \rangle$ .

Unless otherwise stated,  $k_b\tau_{\text{int}}$  was fixed at 0.7 to mimic experimental values obtained in our published work (32). Four sets of  $\tau_{\text{tl}}$  were used: 10-s  $\tau_{\text{tl}}$ , 100-s  $\tau_{\text{tl}}$ , and the three and five  $\tau_{\text{tl}}$  sets (Table S2).

## RESULTS

### Influence of experimental sample size on uncertainty of the estimate of the binding lifetime

First, we set out to investigate whether the size of the experimental data set influences the uncertainty in the error esti-

mate of the outcomes from global fitting, such as the binding lifetime  $\tau$  and photobleaching rate  $k_b$ . This can be achieved by randomly selecting a fraction of experimental data (3–30%) at each  $\tau_{\text{tl}}$ , followed by bootstrapping and global fitting. Toward this goal, we revisited published data from our laboratory in which interval imaging was used to determine the dissociation kinetics of the transcription-repair coupling factor Mfd from DNA in live *E. coli* (32). The entire data set (100%) contains between 1000 and 2000 trajectories (counts lasting at least two frames) at each  $\tau_{\text{tl}}$  (Fig. 2 A, right-most panel). Representative CRTDs after subsampling the experimental data set (3, 10, and 30%) at each  $\tau_{\text{tl}}$  are shown in (Fig. 2 A). Although the  $k_{\text{eff}}\tau_{\text{tl}}$  plot derived from the whole data set resembles a straight line, deviations from linear fits in  $k_{\text{eff}}\tau_{\text{tl}}$  plots can be seen when only a subset of experimental data was used (Fig. 2 B).

To determine the uncertainties in  $k_b$  and  $\tau$  as a result of undersampling, we repeated the subsampling 100 times, and  $k_b$  and  $\tau$  values were obtained from global fitting using Eq. 2 (Fig. 2, C and D). Here, uncertainties in the estimates of  $k_b$  and  $\tau$  are smallest when the entire data set is used (2 and 5%, respectively, Fig. 2, C and D) and, as expected, increase with decreasing number of counts (Fig. 2, C and D). For  $k_b$ , uncertainties increase from 3 to 10% as the percentage of experimental data drop from 30 to 3%, whereas uncertainties in determining binding lifetimes increase from 8 to 35% (Fig. 2, C and D).

Fitting individual CRTD to a monoexponential model to obtain  $k_{\text{eff}}\tau_{\text{tl}}$  plots has been suggested to be used as a guide to determine kinetic heterogeneity (23). Our analysis demonstrates that deviation from linear fits in the  $k_{\text{eff}}\tau_{\text{tl}}$  plots can potentially simply reflect undersampling. Because deviations from linear fits in  $k_{\text{eff}}\tau_{\text{tl}}$  plots can also be used to guide the choice of bi- and triexponential models (23), a fundamental question that faces users is what governs the choice of exponential model? What is the minimal size of data, for which a multiexponential model is appropriate for consideration? Are deviations in the  $k_{\text{eff}}\tau_{\text{tl}}$  plots reliable indicators for the choice of model? To explore these questions in greater detail, we chose to perform simulations that permit us to retain full control of the model parameters and overcome practical limitations of generating large data sets from microscopy experiments.

### Case I: Influence of the size of the data set on the measured lifetime for a single dissociating species

We first explored the relationship between the number of counts ( $n$ ) at each  $\tau_{\text{tl}}$  and uncertainties in estimates of binding lifetimes from monoexponential distributions. To this end, we simulated a population of molecules dissociating with  $k_{\text{off}}$  of  $0.1 \text{ s}^{-1}$ , corresponding to a binding lifetime  $\langle \tau \rangle$  of 10 s, and photobleaching rate  $k_b$  of  $7 \text{ s}^{-1}$  (see Methods). Whereas  $\tau_{\text{int}}$  was constant at 0.1 s,  $\tau_{\text{tl}}$  was varied

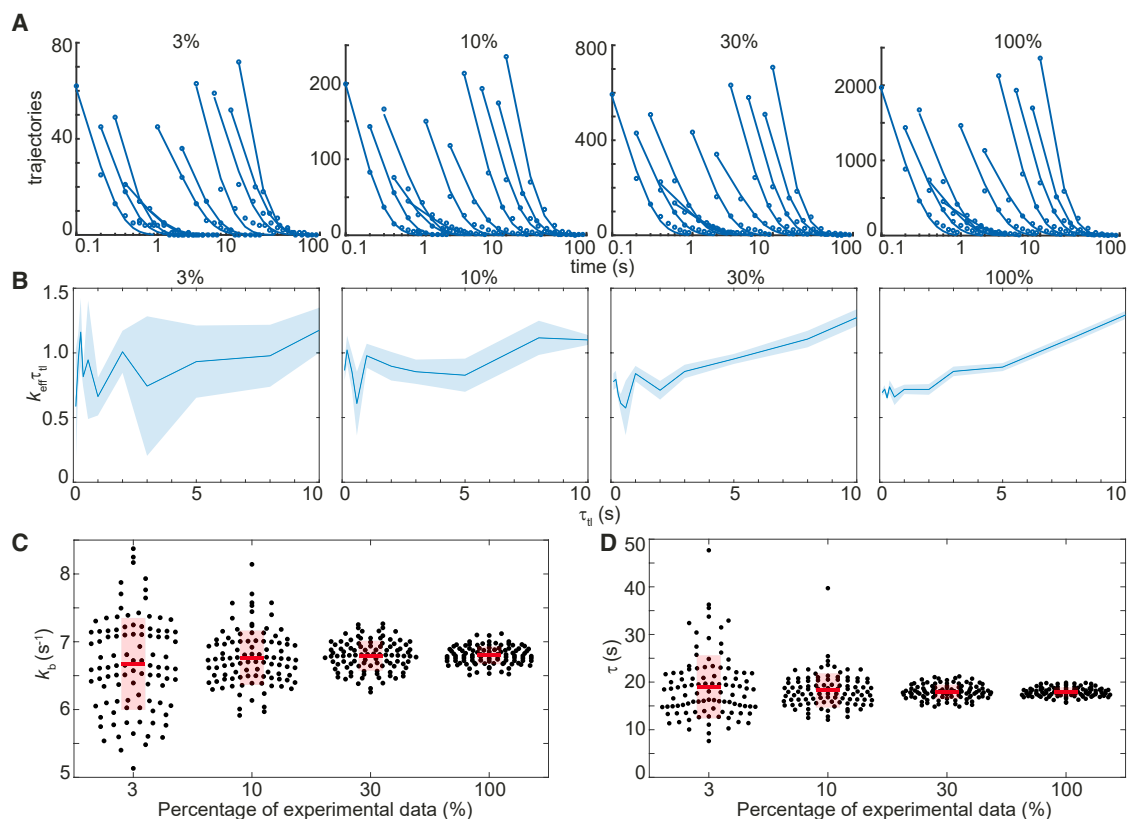

FIGURE 2 Determination of the photobleaching rate and binding lifetime from subsampling experimental data. (A) Representative CRTDs when only 3, 10, or 30% of experimental trajectories were randomly selected. Counts can be approximated as y intercepts of exponential fits of CRTDs. The CRTD from the full data set (*right-most panel*) is reproduced from (32). (B) Shown are  $k_{\text{eff}}\tau_{\text{tl}}$  plots of the corresponding CRTDs (*above*). Shaded error bands are SDs from 10 bootstrapped samples. (C) Scatter plots show distributions of  $k_b$  obtained using the global fitting of 100 subsets of the experimental data at the indicated fraction. Each point represents the average of results from 10 bootstrapped samples. (D) Scatter plots show distributions of  $\tau$  obtained using the global fitting of 100 subsets of the experimental data at the indicated fraction. Similarly, each point represents the average of results from 10 bootstrapped samples. Bars and boxes represent means and SDs of the fitting outcomes of 100 subsets of the data set, respectively. The experimentally measured value of  $\tau = 17.9 \pm 0.9$  s for the entire data set is reproduced from (32). To see this figure in color, go online.

from 0.1 to 10 s (Table S2). These values of  $k_b$ ,  $\langle\tau\rangle$ ,  $\tau_{\text{int}}$ , and  $\tau_{\text{tl}}$  were initially chosen to closely match experimental values used in our published work (see Fig. 2; (32)). The theoretical  $k_{\text{eff}}\tau_{\text{tl}}$  plot is shown as the dashed line (Fig. 3 A). At  $n = 1 \times 10^3$  observations (Fig. 3 A), the  $k_{\text{eff}}\tau_{\text{tl}}$  plot deviates noticeably from the theoretical line. However, as  $n$  increases, the error bands reduce, and the plots closely resemble straight lines (Fig. 3, B–D). At  $1 \times 10^5$  observations, linearly fitting the  $k_{\text{eff}}\tau_{\text{tl}}$  plot (Fig. 3 D) yielded a slope of 0.1 and y intercept of 0.6992, reflecting the specified  $k_{\text{off}}$  ( $0.1 \text{ s}^{-1}$ ) and  $k_b\tau_{\text{int}}$  (0.7). As expected, monoexponential distributions with the same  $k_b\tau_{\text{int}}$  but smaller off rate ( $k_{\text{off}} = 0.01 \text{ s}^{-1}$ ) or without off rate ( $k_{\text{off}} = 0 \text{ s}^{-1}$ ) yielded lines with a smaller slope (Fig. 3, A–D) or essentially flat lines (Fig. 3, A–D).

To characterize the uncertainty (SD,  $\sigma_\tau$ ) in the estimate of the binding lifetime, we repeated the simulation 100 times for each value of  $n$  and determined  $\tau$  using global fitting (Fig. 3 E). As expected for shot noise (37), the relative error  $\sigma_\tau/\langle\tau\rangle$  is proportional to the inverse of the square root of  $n$

with a coefficient of 3.8 (Fig. 3 E, inset). Importantly, the coefficient fluctuates between 3.7 and 5.7 for  $\langle\tau\rangle \leq 50$  s but rises sharply for  $\langle\tau\rangle > 50$  s (Fig. 3 F). This result demonstrates that the uncertainty in estimating the lifetime of long-lived binding events becomes arbitrarily large when the extended lifetime of the fluorophore (by introduction of  $\tau_d$ ) becomes comparable to the binding lifetime. In principle, this limit can be readily overcome by simply selecting larger  $\tau_{\text{tl}}$  values; indeed, simulations of monoexponential distributions of long-lived binding events ( $\tau = 100$  s) indicated that  $\sigma_\tau$  is lower at lower values of  $n$  when  $\tau_{\text{tl}}$  is extended to 100 s, compared to 10 s (Fig. S3).

Therefore, we propose that accurate measurements of lifetime of long-lived binding events require significant increases in either the number of observations ( $n$ ) or the length of  $\tau_{\text{tl}}$  for a fixed photobleaching rate. However, it should be noted that extension of  $\tau_{\text{tl}}$  up to 100 s may not be experimentally feasible for all systems. In our work involving bacterial live-cell imaging in rich media, cell growth and division on the timescale of imaging limit the tracking binding events

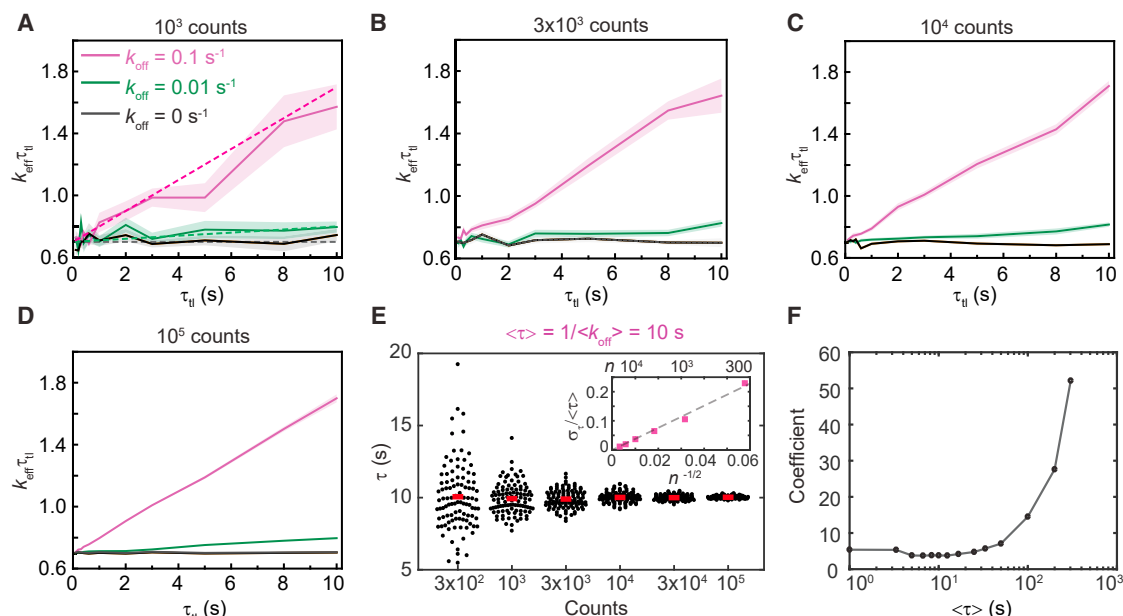

**FIGURE 3** Determination of binding lifetimes from monoexponential distributions. (A–D) Shown are  $k_{\text{eff}}\tau_{\text{tl}}$  plots of monoexponential distributions with  $k_{\text{b}}\tau_{\text{int}}$  of 0.7 and  $k_{\text{off}}$  of 0.1 s<sup>-1</sup>, 0.01 s<sup>-1</sup>, or 0 s<sup>-1</sup>. (A–D) reflect  $k_{\text{eff}}\tau_{\text{tl}}$  plots obtained from simulations containing a number of observations ( $n$ ) equaling (A)  $1 \times 10^3$ , (B)  $3 \times 10^3$ , (C)  $1 \times 10^4$ , or (D)  $1 \times 10^5$  counts in the first bin (see Methods). (A) Dashed lines correspond to theoretical  $k_{\text{eff}}\tau_{\text{tl}}$  plots at the specified  $k_{\text{off}}$  values. Shaded error bands are SDs from 10 bootstrapped samples. (E) Scatter plots show distributions of  $\tau$  obtained using the global fitting from 100 simulated samples for each  $n$  value. Bars represent the mean values. (Inset) The relative error in determining  $\tau$  ( $\sigma_{\tau}/\langle\tau\rangle$ ) reduces with  $n^{-1/2}$  for increasing  $n$ . Dashed line is the linear fit to six data points. (F) Shown is the coefficient in function of  $\sigma_{\tau}/\langle\tau\rangle$  versus  $n^{-1/2}$  at various  $\langle\tau\rangle$ . The sharp increase in coefficients for  $\langle\tau\rangle$  larger than 50 s indicates larger uncertainties in measuring slow processes when the maximal  $\tau_{\text{tl}}$  is limited to 10 s. To see this figure in color, go online.

lasting on the timescale of tens of minutes. Practical limitations imposed by the model organism, growth conditions, and choice of fluorescent protein dictate optimal experimental design.

Further, we anticipated that the photobleaching rate also contributes to  $\sigma_{\tau}$  because faster photobleaching reduces observation times. To examine the effect of  $k_{\text{b}}\tau_{\text{int}}$ , we performed a comprehensive set of simulations with the 10-s  $\tau_{\text{tl}}$  set (Table S2) and  $k_{\text{b}}\tau_{\text{int}}$  varying from 0.007 to 2.1 ( $k_{\text{b}}$  from 0.07 to 70 s<sup>-1</sup> and  $\tau_{\text{int}}$  from 0.01 to 0.1 s). We obtained the relationship between  $\sigma_{\tau}/\tau$ ,  $n$ , and  $k_{\text{b}}\tau_{\text{int}}$  as in Eq. 8:

$$\frac{\sigma_{\tau}}{\tau} = \frac{(2.7379k_{\text{b}}\tau_{\text{int}})^2}{n^{1/2}}. \quad (8)$$

This formula describes the lower bound of errors as other sources of practical errors, such as localization uncertainties and experimental variations, have not been considered. The minimal number of observations required to determine  $\tau$  ( $\langle\tau\rangle \leq 50$  s) with a given uncertainty is therefore as follows:

$$n = (\tau/\sigma_{\tau})^2 \times (2.7379k_{\text{b}}\tau_{\text{int}})^4. \quad (9)$$

For example, when  $k_{\text{b}}\tau_{\text{int}}$  is 0.7, the number of observations required to achieve a relative error of 10% in the estimate of  $\tau$  (where  $\langle\tau\rangle \leq 50$  s) is  $\sim 1350$  (see Fig. 3 E). This

equation also highlights the importance of using fluorophores with high photostability; a twofold increase in  $k_{\text{b}}$  needs to be compensated by a 16-fold increase in  $n$ .

### Case II: Detection of two species with resolvable lifetimes

Next, we examined the situation in which a second kinetic subpopulation is present in the system. A second population with a faster off rate yields  $k_{\text{eff}}\tau_{\text{tl}}$  plots that deviate from straight lines (23). However, as we demonstrate, deviations can also be a result of shot noise at low  $n$  (see Figs. 2 B and 3, A–D). To identify the minimal  $n$  at which one can determine with a specified confidence that a biexponential model is appropriate, we simulated CRTDs using Eq. 5. First, we performed simulations with off rates that are an order of magnitude apart:  $k_{\text{off}1} = 0.1$  s<sup>-1</sup> (intermediate rate) and  $k_{\text{off}2} = 1$  s<sup>-1</sup> (fast rate). The amplitude  $B$  of the intermediate dissociating population was varied from 10 to 90% (Fig. 4).

When the majority of the population dissociates with the intermediate rate  $k_{\text{off}1}$  ( $B = 90\%$ ), the  $k_{\text{eff}}\tau_{\text{tl}}$  plots resemble those of monoexponential distribution with the single  $k_{\text{off}}$  of 0.1 s<sup>-1</sup> (compare Fig. 4, A–D, and Fig. 3, A–D). As before, increasing the number of observations significantly improved the quality of the  $k_{\text{eff}}\tau_{\text{tl}}$  plots (Fig. 4, A–D). These simulations reveal that a short-lived second subpopulation

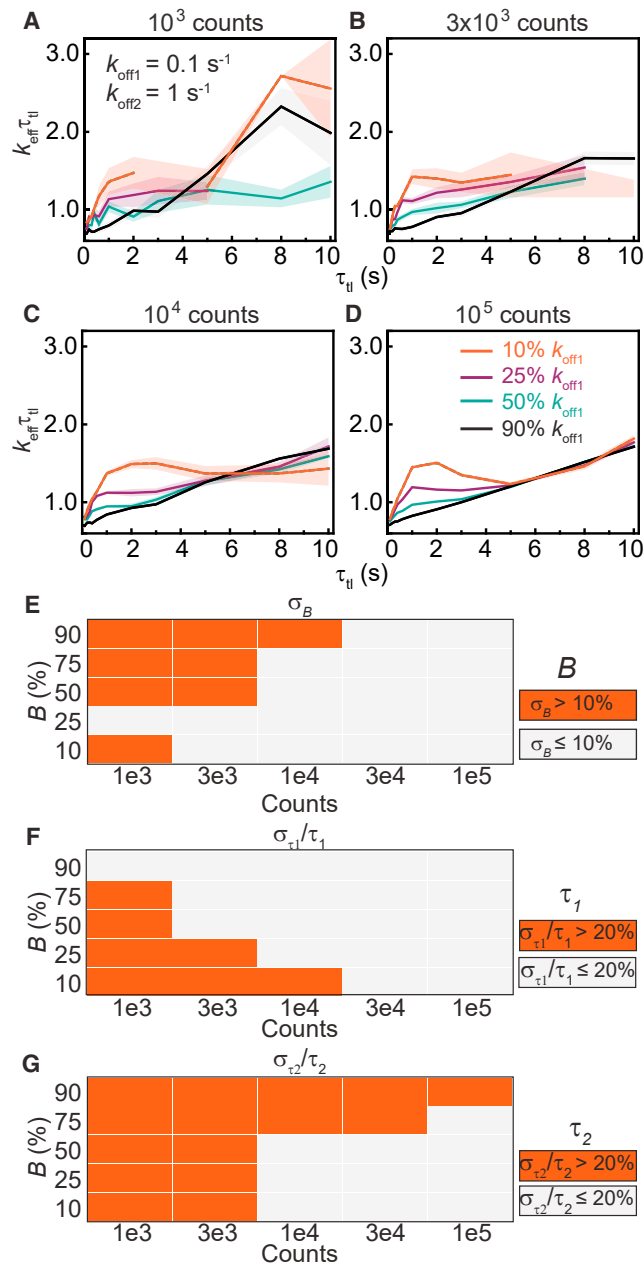

**FIGURE 4** Determination of binding lifetimes and amplitudes from biexponential distributions with an intermediate rate ( $k_{\text{off1}}$ ) and a fast rate ( $k_{\text{off2}} = 10 k_{\text{off1}}$ ). (A–D) Shown are  $k_{\text{eff}}\tau_{\text{til}}$  plots of biexponential distributions with  $k_{\text{b}}\tau_{\text{int}}$  of 0.7,  $k_{\text{off1}}$  and  $k_{\text{off2}}$  of 0.1 and 1.0  $\text{s}^{-1}$ , respectively, with (A)  $1 \times 10^3$ , (B)  $3 \times 10^3$ , (C)  $1 \times 10^4$ , or (D)  $1 \times 10^5$  observations. The amplitude of  $k_{\text{off1}}$  ( $B$ ) is 10%, 25%, 50%, or 90%. Shaded error bars are SDs from 10 bootstrapped samples. (E–G) Heatmaps show errors in estimates of  $B$ ,  $\tau_1$ , and  $\tau_2$  obtained using the global fitting of 100 simulated distributions for each  $n$  value (see Fig. S4 for distributions). To see this figure in color, go online.

does not manifest as a visible feature in the  $k_{\text{eff}}\tau_{\text{til}}$  plots when it is present only to the extent of 10% in the observations. To examine if the two populations could be resolved with global fitting using the biexponential model, we determined

binding lifetimes and amplitudes from 100 simulations (Fig. S4). Unsurprisingly, we found that the accuracies and precisions of determining  $B$ ,  $\tau_1$ , and  $\tau_2$  increase with  $n$ . Although estimation of  $\tau_1$  is robust (Fig. 4 F; Fig. S4 B), global fitting of CRTDs to the biexponential model at low counts suffers from a bias toward the fast-dissociating subpopulation, with its amplitude being overestimated and  $\tau_2$  being underestimated (Fig. 4, E and G; Fig. S4, A and C). This bias is observed to a lesser extent when  $k_{\text{off1}}$  is present at 75 or 50% (Fig. 4, E–G; Fig. S4).

As the amplitude of the fast-dissociating subpopulation increased ( $B$  equal to 25 or 10%), fewer observations were found at long intervals. Insufficient counts resulted in missing data points at these  $\tau_{\text{til}}$  ( $\tau_{\text{til}} \geq 5$  s) in  $k_{\text{eff}}\tau_{\text{til}}$  plots at low counts ( $1 \times 10^3$  and  $3 \times 10^3$ , Fig. 4, A and B). However, the  $k_{\text{eff}}\tau_{\text{til}}$  plots extended to the full  $\tau_{\text{til}}$  range of 10 s when  $n$  increases to  $1 \times 10^4$  and  $1 \times 10^5$  (Fig. 4, C and D). As expected, deviations from straight lines were found in the 0–5 s regime, reflecting the presence of the fast-dissociating subpopulation. Because contributions from the fast-dissociating subpopulation drop sharply at long timescales, the  $k_{\text{eff}}\tau_{\text{til}}$  plots converge to the straight line exhibited by monoexponential distributions with  $k_{\text{off1}}$  (Fig. 4, C and D). Further analysis by integrating the area under the peaks in the 0 to 5 s region shows the area increases exponentially with the amplitude of the fast-dissociating subpopulation (Fig. S5). When the fast-dissociating subpopulation represents the majority, the accuracy and precision in determining  $B$ ,  $\tau_1$ , and  $\tau_2$  also increase with  $n$  (Fig. 4, E–G; Fig. S4).

Based on the observation that accurate measurements of long-lived binding events require the extension of  $\tau_{\text{til}}$  to greater than 10 s, we anticipated that resolving two kinetic subpopulations (one with a slow rate ( $k_{\text{off1}}$  of 0.01  $\text{s}^{-1}$ ;  $\langle\tau_1\rangle = 100$  s) and an intermediate rate ( $k_{\text{off2}}$  of 0.1  $\text{s}^{-1}$ ;  $\langle\tau_2\rangle = 10$  s)) is challenging when the largest  $\tau_{\text{til}}$  is 10 s. Consistent with this, the  $k_{\text{eff}}\tau_{\text{til}}$  plots in the 0–10 s range appear linear (Fig. 5, A–C), resembling those of monoexponential distributions. Hence, we attempted to fit the CRTDs at  $1 \times 10^5$  counts to a monoexponential model (Eq. 2), yielding apparent binding lifetimes ( $\tau^*$ ) that lie between  $\langle\tau_1\rangle$  and  $\langle\tau_2\rangle$  (Fig. 5 D). Fitting mean  $\tau^*$  versus  $B$  to exponential function results in Eq. 10:

$$\tau^* = \langle\tau_2\rangle e^{\log(\langle\tau_1\rangle/\langle\tau_2\rangle)B}. \quad (10)$$

Thus,  $B$  can be derived from  $\tau^*$ , where  $\langle\tau_1\rangle$  and  $\langle\tau_2\rangle$  are known.

From the simulations, fitting the CRTDs with  $n$  less than  $3 \times 10^4$  to the biexponential model yields unreliable results (Fig. 5, E–G; Fig. S6). Across various amplitudes of  $k_{\text{off1}}$ , the species with lifetime  $\tau_1$  is often underestimated and corresponds to  $\tau^*$  at that amplitude (compare Fig. 5 F to Fig. 5 D). Similarly,  $\tau_2$  is also underestimated, but eventually approaches  $\langle\tau_2\rangle$  of 10 s when  $n$  reached  $1 \times 10^6$  counts, and the amplitude of  $k_{\text{off2}}$  subpopulation is more than 25% (Fig. 5 G).

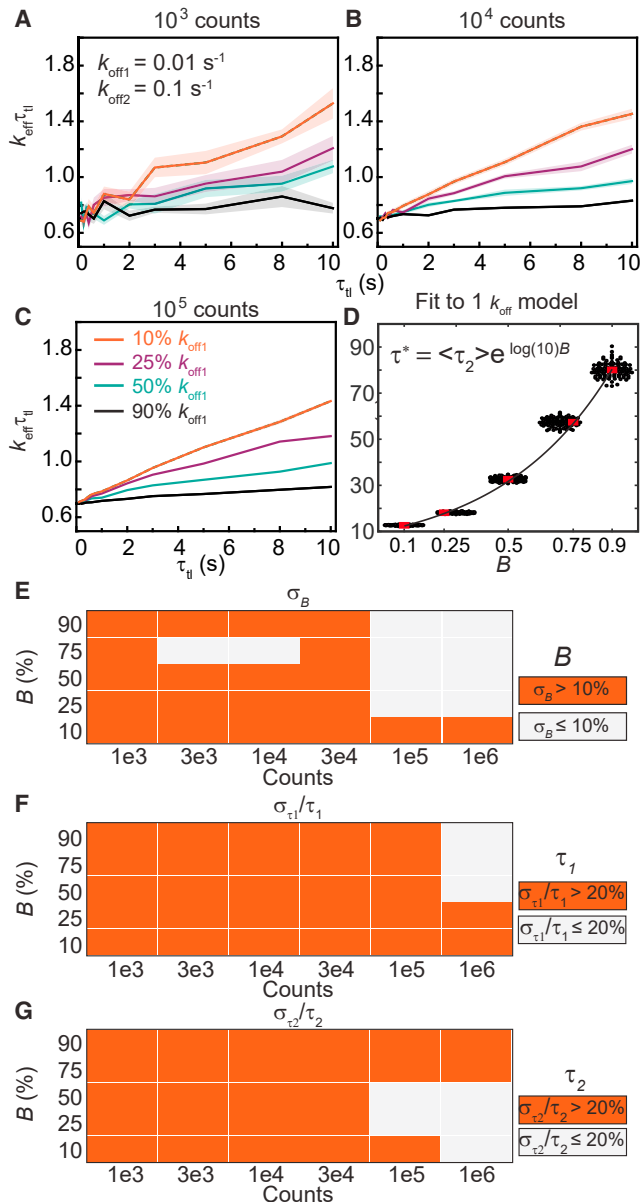

**FIGURE 5** Determination of binding lifetimes and amplitudes from biexponential distributions with a slow rate ( $k_{\text{off1}}$ ) and an intermediate rate ( $k_{\text{off2}} = 10k_{\text{off1}}$ ). (A–C) Shown are  $k_{\text{eff}}\tau_{\text{tl}}$  plots of biexponential distributions with  $k_{\text{b}}\tau_{\text{int}}$  of 0.7,  $k_{\text{off1}}$  and  $k_{\text{off2}}$  of 0.01 and 0.1 s<sup>−1</sup>, respectively, with (A) 1 × 10<sup>3</sup>, (B) 1 × 10<sup>4</sup>, or (C) 1 × 10<sup>5</sup> observations. The amplitude of  $k_{\text{off1}}$  ( $B$ ) is 10%, 25%, 50%, or 90%. Shaded error bars are SDs from 10 bootstrapped samples. (D) Scatter plots show a distribution of apparent  $\tau^*$  obtained from the fitting of 100 simulated biexponential distributions at a specified  $B$  and 1 × 10<sup>5</sup> counts to a monoexponential model. Line is the exponential fit between the average of  $\tau^*$  (represented by bars) and  $B$ . (E–G) Heatmaps show errors in estimates of  $B$ ,  $\tau_1$ , and  $\tau_2$  obtained using the global fitting of 100 simulated distributions for each  $n$  value (see Fig. S6 for distributions). To see this figure in color, go online.

On the other hand, when the above distributions were simulated using the 100-s  $\tau_{\text{tl}}$  set, deviations from straight lines in  $k_{\text{eff}}\tau_{\text{tl}}$  plots were observed in the 0–30 s regime and when  $B$  is smaller than 75% (Fig. S7 A). In this case,

as expected, accuracies in determining  $B$ ,  $\tau_1$ , and  $\tau_2$  follow the same trends as discussed in Fig. 4 (Fig. S7, B–D).

### Case III: Detection of two species with closely matched lifetimes

We anticipated that resolution limits inherent to exponential analyses (34) would reduce the ability to resolve closely-spaced rates. To test this hypothesis, we simulated biexponential distributions with rates that are only threefold apart: an intermediate rate  $k_{\text{off1}}$  of 0.1 s<sup>−1</sup> and a fast rate  $k_{\text{off2}}$  of 0.3 s<sup>−1</sup>. Under conditions that yield sufficient observations at long intervals ( $n \geq 1 \times 10^4$ ), examination of the  $k_{\text{eff}}\tau_{\text{tl}}$  plots often fails to identify the presence of multiple subpopulations in the form of deviation from straight lines (Fig. 6, A–D). Only when the fast rate is present at 90% can deviations be observed in the form of a broad convex spanning from 0 to 10 s (Fig. 6, C and D). Fitting to Eq. 5 yields unreliable results for  $B$  and  $\tau_2$  for  $n \leq 1 \times 10^4$  (Fig. 6, E and G; Fig. S8, A and C), whereas the accuracy in determining  $\tau_1$  requires  $3 \times 10^3$  observations or  $\langle B \rangle$  to be larger than 25% (Fig. 6 F; Fig. S8 B). Fitting CRTDs at low counts ( $n \leq 1 \times 10^4$ ) to the biexponential model should be avoided as one often obtains two kinetics subpopulations with artificially enhanced rate separation and substantial amplitudes, regardless of the true amplitudes (Fig. 6, E–G; Fig. S8).

### Case IV: Detection of three species

The resolution limit as well as dynamic range limit that we demonstrated above raises the question if triexponential distributions can be faithfully resolved under the specified experimental condition (ranges of  $\tau_{\text{tl}}$  and  $n$ ). To address this issue, we simulated triexponential distributions (Eq. 6) with off rates spanning two orders of magnitude (0.01, 0.1, and 1 s<sup>−1</sup>), using the 100-s  $\tau_{\text{tl}}$  set. The diversity in  $k_{\text{eff}}\tau_{\text{tl}}$  plots obtained by varying  $B_1$  and  $B_2$  is illustrated in Fig. 7 A. Three kinetic subpopulations are apparent when  $B_1$  is a third of  $B_2$  and  $B_2$  in turn is a third of  $B_3$  ( $1 - B_1 - B_2$ ). We further characterized uncertainties in amplitudes and binding lifetimes obtained using global fitting to the triexponential model (Methods). In general, accuracy in determining the amplitudes and lifetimes improves with increasing  $n$  (Fig. 7, B–F; Fig. S9). However, when the slowly dissociating subpopulation dominates ( $B_1 = 9/13$ ), increasing  $n$  does not yield more accurate estimates. As in the case of the biexponential simulations, we observed consistent biases toward faster binding lifetimes (Fig. S9).

### The choice of $\tau_{\text{tl}}$

Given a finite amount of experimental time, should experimenters collect data with more  $\tau_{\text{tl}}$  values (increase  $N_{\text{interval}}$ ), or should we obtain more observations (increase  $n$ ) with a set containing fewer  $\tau_{\text{tl}}$  values? To identify the optimum

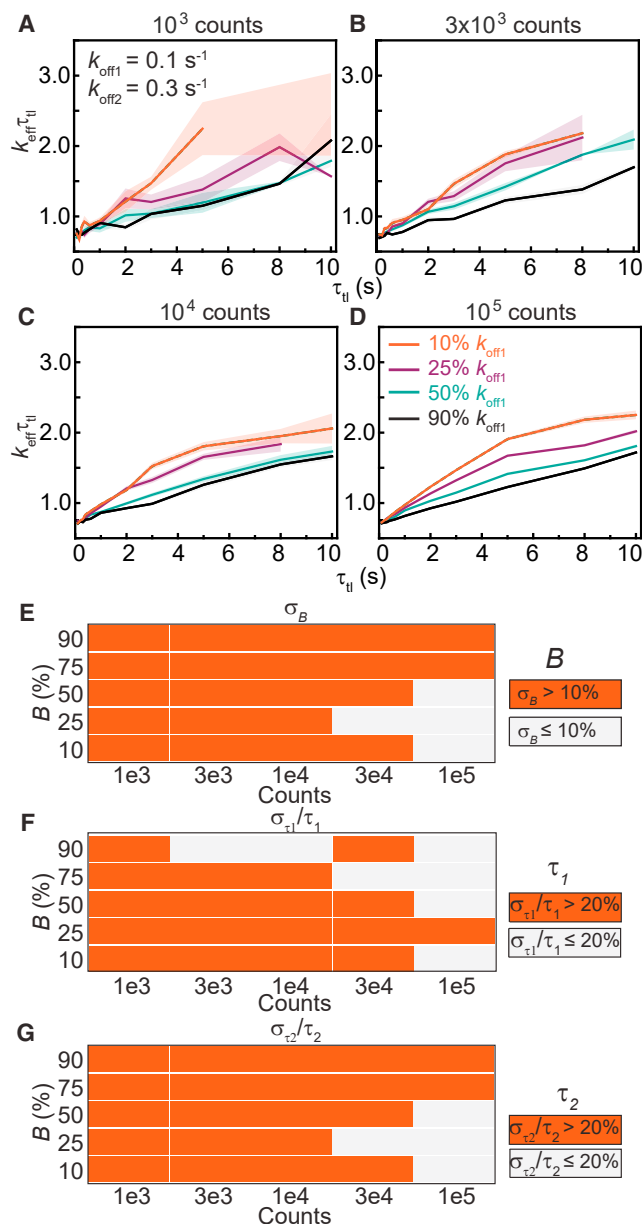

**FIGURE 6** Determination of binding lifetimes and amplitudes from biexponential distributions with closely spaced rates ( $k_{\text{off}2} = 3k_{\text{off}1}$ ). (A–D) Shown are  $k_{\text{eff}}\tau_{\text{tl}}$  plots of biexponential distributions with  $k_b\tau_{\text{int}}$  of 0.7,  $k_{\text{off}1}$  and  $k_{\text{off}2}$  of 0.1 and  $0.3 \text{ s}^{-1}$ , respectively, with (A)  $1 \times 10^3$ , (B)  $3 \times 10^3$ , (C)  $1 \times 10^4$ , or (D)  $1 \times 10^5$  observations. The amplitude of  $k_{\text{off}1}$  ( $B$ ) is 10%, 25%, 50%, or 90%. Shaded error bars are SDs from 10 bootstrapped samples. (E–G) Heatmaps show errors in estimates of  $B$ ,  $\tau_1$ , and  $\tau_2$  obtained using the global fitting of 100 simulated distributions for each  $n$  value (see Fig. S8 for distributions). To see this figure in color, go online.

choice of  $\tau_{\text{tl}}$ , we simulated biexponential distributions with an intermediate rate ( $k_{\text{off}1} = 0.1 \text{ s}^{-1}$ ) and a fast rate ( $k_{\text{off}2} = 1 \text{ s}^{-1}$ ) using a  $\tau_{\text{tl}}$  set containing either three ( $N_3$ ) or five ( $N_5$ )  $\tau_{\text{tl}}$  values, ranging from 0.1 to 10 s (Table S2). Because fitting outcomes are unreliable in the three  $\tau_{\text{tl}}$  set (compare Fig. S10 to Fig. S11), we decided to examine the simulations with the five  $\tau_{\text{tl}}$  set further. These simula-

tions yielded  $k_{\text{eff}}\tau_{\text{tl}}$  plots that closely resemble those in Fig. 4 (see Fig. 8, A–D), and similarly, deviations from straight lines are also reliable indicators of kinetic heterogeneity when  $B$  is less than 90%. As expected, estimates of  $B$ ,  $\tau_1$ , and  $\tau_2$  are more accurate with larger  $n$  (Fig. S10).

Comparing the simulations using the five  $\tau_{\text{tl}}$  and the 10-s  $\tau_{\text{tl}}$  (11  $\tau_{\text{tl}}$  values) sets for the same  $n$ , errors of estimates are almost always smaller in simulated distributions with the 10-s  $\tau_{\text{tl}}$  set ( $\sigma_{11}/\sigma_5 < 1$ , see Fig. 8 E). By extension of Eq. 8, error ratios ( $\sigma_{11}/\sigma_5$ ) smaller than  $1/\sqrt{(11/5)}$  or 0.67 indicate the benefit of increasing  $N_{\text{interval}}$  outweighs the benefit of increasing  $n$  with the five  $\tau_{\text{tl}}$  set, whereas error ratios larger than 0.67 represent redundancy in  $\tau_{\text{tl}}$ . Redundancy in  $\tau_{\text{tl}}$  was observed in some cases when the intermediate dissociating subpopulation is the majority ( $B$  between 75 and 90%) (Fig. 8 E). However, when the majority dissociates with the fast rate ( $B$  between 10 and 50%), the benefit of sampling with more  $\tau_{\text{tl}}$  is clear ( $\sigma_{11}/\sigma_5 < 0.67$ ), especially with  $n \geq 1 \times 10^4$ . Thus, we concluded the net benefit of increasing  $N_{\text{interval}}$  is greater than increasing the number of counts with a set of fewer  $\tau_{\text{tl}}$  values.

## DISCUSSION

In this work, we used experimental and simulated data to explore the influence of shot noise, resolution limit, and dynamic range limit on resolving multiple kinetic subpopulations in single-molecule time-lapse imaging experiments (Fig. 9). Within the dynamic range and resolution limit, the determination of binding lifetimes and amplitudes in monoexponential and multiexponential distributions are reliable in general, especially with at least  $1 \times 10^4$  counts.

As showed in Eq. 8, the relative error in  $\tau$  determination scales with the square of  $k_b\tau_{\text{int}}$  and the inverse square root of  $n$ . This emphasizes the importance of choosing imaging conditions to minimize  $k_b\tau_{\text{int}}$  as a twofold increase in  $k_b\tau_{\text{int}}$  needs to be compensated by a 16-fold increase in  $n$ . A balance has to be struck here to ensure good signal-to-background ratio, a prerequisite for reliable particle tracking. These findings also highlight the importance of developing and using fluorophores with higher photostability and brightness for live-cell applications as these would greatly reduce uncertainties in measurements. In practice, the choice of fluorescent protein should be made with great care because fluorescent proteins often exhibit undesirable properties that limit their utility (38–42).

Errors obtained from repeating the experiments can be an underestimation compared to inherent errors conferred by shot noise when fitting is ill conditioned (43), which is often the case when minimizing using multiobjective functions (44). Therefore, reports of binding lifetime measurements using these time-lapse imaging approaches should clearly state  $k_b\tau_{\text{int}}$  from fitting and  $n$  from experimental data. This would enable a theoretical error estimation of  $\tau$  and avoid the overinterpretation of experimental results.

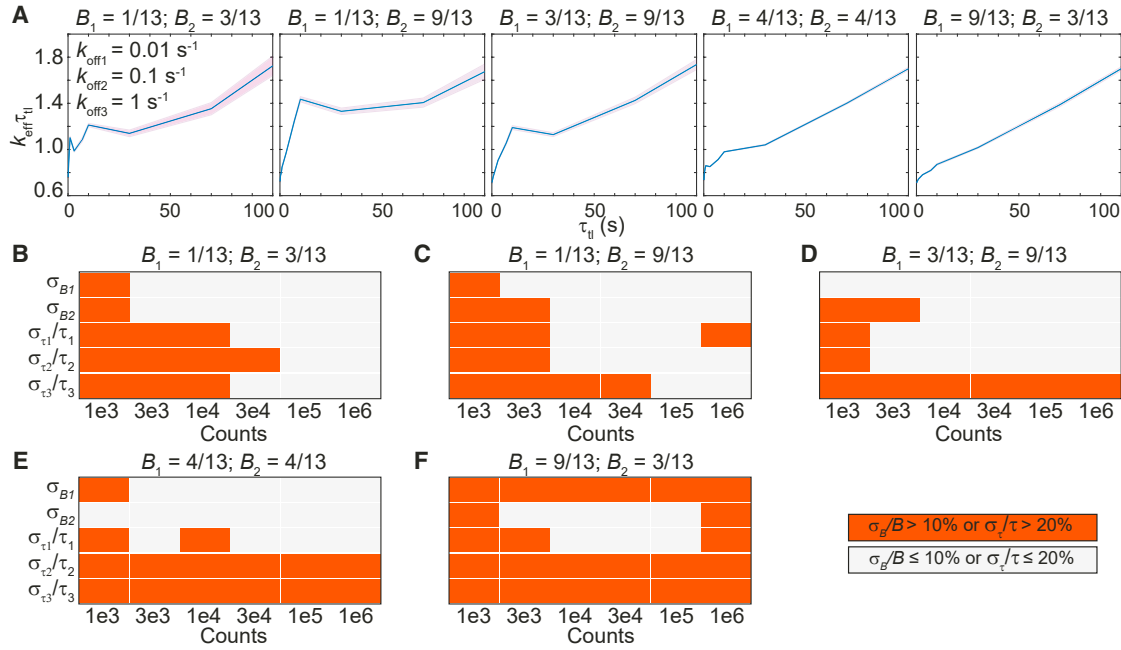

FIGURE 7 Determination of binding lifetimes and amplitudes from triexponential distributions with a slow rate ( $k_{\text{off}1}$ ), an intermediate rate ( $k_{\text{off}2} = 10k_{\text{off}1}$ ), and a fast rate ( $k_{\text{off}3} = 10k_{\text{off}2}$ ), using the 100-s  $\tau_{\text{II}}$  set. From left to right, five panels in each row correspond to different amplitudes of each subpopulation (displayed on top). (A) Shown are  $k_{\text{eff}}\tau_{\text{II}}$  plots of triexponential distributions with  $k_{\text{b}}\tau_{\text{int}}$  of 0.7 and  $k_{\text{off}1}$ ,  $k_{\text{off}2}$ , and  $k_{\text{off}3}$  of 0.01, 0.1, and 1  $\text{s}^{-1}$ , respectively, with  $1 \times 10^6$  observations. Shaded error bands are SDs from 10 bootstrapped samples. (B–F) Heatmaps show errors in estimates of  $B_1$ ,  $B_2$ ,  $\tau_1$ ,  $\tau_2$ , and  $\tau_3$  obtained using the global fitting of 100 simulated distributions at various preset values of  $B_1$  and  $B_2$  (see Fig. S9 for distributions). To see this figure in color, go online.

We found  $k_{\text{eff}}\tau_{\text{II}}$  plots useful for guiding the fitting model when the number of counts is sufficiently large (more than  $1 \times 10^4$ ) as deviations from straight lines faithfully reflect heterogeneity in binding kinetics. The reverse is not necessarily true. Good linear fits, seen at large  $n$  values, can reflect

one of the following three scenarios: 1) the absence of multiple populations, 2) subpopulations with off rates that are within the resolution limit, or 3) subpopulations in which the off rate of one population lies beyond the dynamic range. This dynamic range is determined by the photobleaching rate

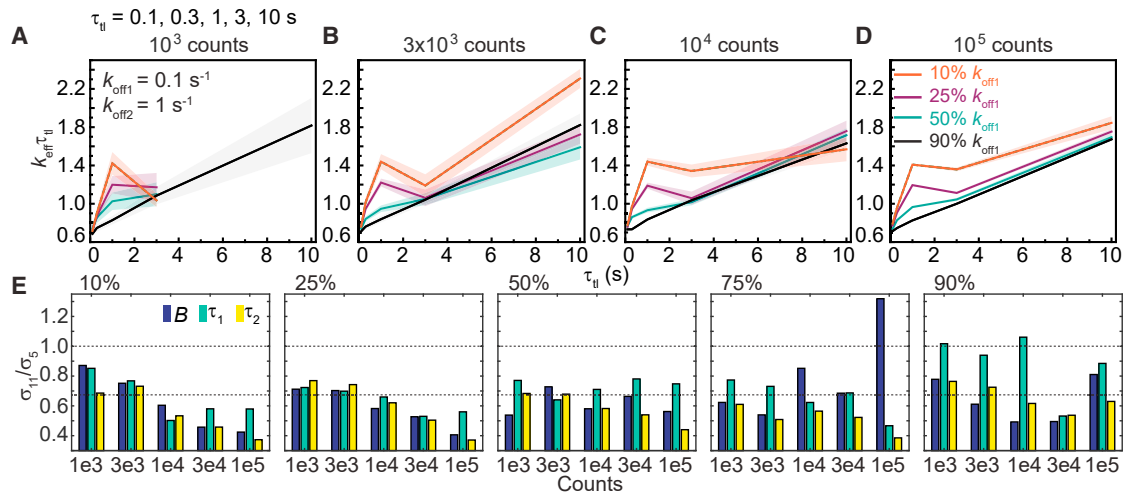

FIGURE 8 Determination of binding lifetimes and amplitudes from biexponential distributions using a  $\tau_{\text{II}}$  set containing five  $\tau_{\text{II}}$  values (Table S2), an intermediate rate ( $k_{\text{off}1} = 0.1 \text{ s}^{-1}$ ), and a fast rate ( $k_{\text{off}2} = 1 \text{ s}^{-1}$ ). (A–D) Shown are  $k_{\text{eff}}\tau_{\text{II}}$  plots of biexponential distributions with (A)  $1 \times 10^3$ , (B)  $3 \times 10^3$ , (C)  $1 \times 10^4$  or (D)  $1 \times 10^5$  observations. The amplitude of  $k_{\text{off}1}$  (B) is 10%, 25%, 50%, or 90%. Shaded error bands are SDs from 10 bootstrapped samples. (E) Bar plots show ratios of error estimates obtained from simulations with 11 and 5  $\tau_{\text{II}}$  values at the same  $n$ . To see this figure in color, go online.

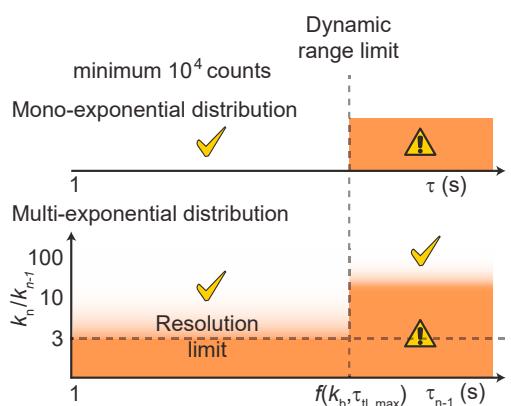

FIGURE 9 Dynamic range and resolution limits in resolving multiple populations using the time-lapse imaging technique with photobleaching-prone fluorescent probes. Dynamic range limit is a function of the photobleaching rate ( $k_b$ ) and the maximal  $\tau_{tl}$  ( $\tau_{tl\_max}$ ) used in experimental conditions.  $\tau_{n-1}$  is the longest binding lifetime in a multiexponential distribution within pairs of off rates  $k_n$  and  $k_{n-1}$ . Shaded zones indicate conditions in which errors in estimates of  $\tau$  and the amplitude are high. To see this figure in color, go online.

and the maximal  $\tau_{tl}$  used in the experiment. When the mono-exponential model is used to fit those data, an apparent binding lifetime  $\tau^*$ , whose value lies between the two true binding lifetimes, is obtained. Although suboptimal,  $\tau^*$  depends on the proportion of molecules in each kinetic subpopulation; a larger presence of the fast-dissociating subpopulation yields smaller  $\tau^*$ . This in turn can report on a change in binding kinetics when the biology is manipulable—for instance, with binding partners or drugs.

Can statistical information such as reduced  $\chi^2$  be used to decide the model that best describes the data? Computing these criteria requires the determination of the degree of freedom, which still needs to be analytically derived for the nonlinear models used in this method (45–48). Instead of using statistical criteria, the selection of the fitting model using  $k_{eff}\tau_{tl}$  plot can be complemented with experimental design. For example, in a case in which a biexponential model is invoked, it might be tempting to attribute subpopulations to molecules performing certain activities, such as the binding of DNA repair proteins to a damaged or non-damaged substrate. These hypotheses can be tested using structure-function mutants in which one or few catalytic activities are inhibited, hence yielding predictable changes in  $k_{eff}\tau_{tl}$  plots and fitting results. Finally, where possible, we recommend approaches that utilize multiple experimental designs to reproducibly observe or enrich the hypothesized populations.

## Software

Our algorithms are freely available as open source MATLAB codes from <https://github.com/hanngocho/off-rate-simulation>.

## SUPPORTING MATERIAL

Supporting Material can be found online at <https://doi.org/10.1016/j.bpj.2019.07.015>.

## AUTHOR CONTRIBUTIONS

H.N.H., H.G., and A.M.v.O. designed research. H.N.H. wrote the codes, conducted the simulations, and wrote the first draft. D.Z. contributed to the codes, with support from J.K. H.G. and A.M.v.O. revised the manuscript and supervised research.

## ACKNOWLEDGMENTS

We thank Dr. Joris M. H. Goudsmits for assisting with the simulation codes in MATLAB. D.Z. gratefully acknowledges support from the Elite Network of Bavaria program “Macromolecular Science.”

This work was supported by Australian Research Council grant DP180100858 and Australian Laureate Fellowship FL140100027 (to A.M.v.O.).

## REFERENCES

- Lu, H. P., L. Xun, and X. S. Xie. 1998. Single-molecule enzymatic dynamics. *Science*. 282:1877–1882.
- Xie, X. S. 2002. Single-molecule approach to dispersed kinetics and dynamic disorder: probing conformational fluctuation and enzymatic dynamics. *J. Chem. Phys.* 117:11024–11032.
- Larson, M. H., R. Landick, and S. M. Block. 2011. Single-molecule studies of RNA polymerase: one singular sensation, every little step it takes. *Mol. Cell*. 41:249–262.
- Stratmann, S. A., and A. M. van Oijen. 2014. DNA replication at the single-molecule level. *Chem. Soc. Rev.* 43:1201–1220.
- Gahlmann, A., and W. E. Moerner. 2014. Exploring bacterial cell biology with single-molecule tracking and super-resolution imaging. *Nat. Rev. Microbiol.* 12:9–22.
- Bell, J. C., and S. C. Kowalczykowski. 2016. Mechanics and single-molecule interrogation of DNA recombination. *Annu. Rev. Biochem.* 85:193–226.
- Kaniecki, K., L. De Tullio, and E. C. Greene. 2018. A change of view: homologous recombination at single-molecule resolution. *Nat. Rev. Genet.* 19:191–207.
- Kong, M., E. C. Beckwitt, ..., B. Van Houten. 2017. Single-molecule methods for nucleotide excision repair: building a system to watch repair in real time. *Methods Enzymol.* 592:213–257.
- Floyd, D. L., J. R. Ragains, ..., A. M. van Oijen. 2008. Single-particle kinetics of influenza virus membrane fusion. *Proc. Natl. Acad. Sci. USA*. 105:15382–15387.
- Yan, X., T. A. Hoek, ..., M. E. Tanenbaum. 2016. Dynamics of translation of single mRNA molecules in vivo. *Cell*. 165:976–989.
- Ghodke, H., H. Wang, ..., B. Van Houten. 2014. Single-molecule analysis reveals human UV-damaged DNA-binding protein (UV-DDB) dimerizes on DNA via multiple kinetic intermediates. *Proc. Natl. Acad. Sci. USA*. 111:E1862–E1871.
- Volkov, I. L., M. Lindén, ..., M. Johansson. 2018. tRNA tracking for direct measurements of protein synthesis kinetics in live cells. *Nat. Chem. Biol.* 14:618–626.
- Leake, M. C., N. P. Greene, ..., B. C. Berks. 2008. Variable stoichiometry of the TatA component of the twin-arginine protein transport system observed by in vivo single-molecule imaging. *Proc. Natl. Acad. Sci. USA*. 105:15376–15381.

14. Sako, Y., S. Minoghchi, and T. Yanagida. 2000. Single-molecule imaging of EGFR signalling on the surface of living cells. *Nat. Cell Biol.* 2:168–172.
15. Dixit, R., J. L. Ross, ..., E. L. Holzbaur. 2008. Differential regulation of dynein and kinesin motor proteins by tau. *Science*. 319:1086–1089.
16. Liu, J., J. Hanne, ..., R. Fishel. 2016. Cascading MutS and MutL sliding clamps control DNA diffusion to activate mismatch repair. *Nature*. 539:583–587.
17. Presman, D. M., D. A. Ball, ..., G. L. Hager. 2017. Quantifying transcription factor binding dynamics at the single-molecule level in live cells. *Methods*. 123:76–88.
18. Li, Y., J. W. Schroeder, ..., J. S. Biteen. 2018. Visualizing bacterial DNA replication and repair with molecular resolution. *Curr. Opin. Microbiol.* 43:38–45.
19. Ghodke, H., H. Ho, and A. M. van Oijen. 2018. Single-molecule live-cell imaging of bacterial DNA repair and damage tolerance. *Biochem. Soc. Trans.* 46:23–35.
20. Kapanidis, A. N., S. Uphoff, and M. Stracy. 2018. Understanding protein mobility in bacteria by tracking single molecules. *J. Mol. Biol.* 430:4443–4455.
21. Elf, J., and I. Barkefors. 2019. Single-molecule kinetics in living cells. *Annu. Rev. Biochem.* 88:635–659.
22. Mazza, D., A. Abernathy, ..., J. G. McNally. 2012. A benchmark for chromatin binding measurements in live cells. *Nucleic Acids Res.* 40:e119.
23. Gebhardt, J. C., D. M. Suter, ..., X. S. Xie. 2013. Single-molecule imaging of transcription factor binding to DNA in live mammalian cells. *Nat. Methods*. 10:421–426.
24. Shaner, N. C., P. A. Steinbach, and R. Y. Tsien. 2005. A guide to choosing fluorescent proteins. *Nat. Methods*. 2:905–909.
25. Liu, Z., L. D. Lavis, and E. Betzig. 2015. Imaging live-cell dynamics and structure at the single-molecule level. *Mol. Cell*. 58:644–659.
26. Elf, J., G. W. Li, and X. S. Xie. 2007. Probing transcription factor dynamics at the single-molecule level in a living cell. *Science*. 316:1191–1194.
27. Hipp, L., J. Beer, ..., B. Knöll. 2019. Single-molecule imaging of the transcription factor SRF reveals prolonged chromatin-binding kinetics upon cell stimulation. *Proc. Natl. Acad. Sci. USA*. 116:880–889.
28. Reisser, M., A. Palmer, ..., J. C. M. Gebhardt. 2018. Single-molecule imaging correlates decreasing nuclear volume with increasing TF-chromatin associations during zebrafish development. *Nat. Commun.* 9:5218.
29. Agarwal, H., M. Reisser, ..., J. C. M. Gebhardt. 2017. Direct observation of cell-cycle-dependent interactions between CTCF and chromatin. *Biophys. J.* 112:2051–2055.
30. Liao, Y., Y. Li, ..., J. S. Biteen. 2016. Single-molecule DNA polymerase dynamics at a bacterial replisome in live cells. *Biophys. J.* 111:2562–2569.
31. Mignolet, J., S. Holden, ..., P. H. Viollier. 2016. Functional dichotomy and distinct nanoscale assemblies of a cell cycle-controlled bipolar zinc-finger regulator. *eLife*. 5:e18647.
32. Ho, H. N., A. M. van Oijen, and H. Ghodke. 2018. The transcription-repair coupling factor Mfd associates with RNA polymerase in the absence of exogenous damage. *Nat. Commun.* 9:1570.
33. Clauß, K., A. P. Popp, ..., J. C. M. Gebhardt. 2017. DNA residence time is a regulatory factor of transcription repression. *Nucleic Acids Res.* 45:11121–11130.
34. Istratov, A. A., and O. F. Vyvenko. 1999. Exponential analysis in physical phenomena. *Rev. Sci. Instrum.* 70:1233–1257.
35. Tokunaga, M., N. Imamoto, and K. Sakata-Sogawa. 2008. Highly inclined thin illumination enables clear single-molecule imaging in cells. *Nat. Methods*. 5:159–161.
36. Dickson, R. M., A. B. Cubitt, ..., W. E. Moerner. 1997. On/off blinking and switching behaviour of single molecules of green fluorescent protein. *Nature*. 388:355–358.
37. Schottky, W. 1918. Über spontane Stromschwankungen in verschiedenen Elektrizitätsleitern. *Ann. Phys.* 362:541–567.
38. Swilius, M. T., and G. J. Jensen. 2012. The helical MreB cytoskeleton in *Escherichia coli* MC1000/pLE7 is an artifact of the N-Terminal yellow fluorescent protein tag. *J. Bacteriol.* 194:6382–6386.
39. Landgraf, D., B. Okumus, ..., J. Paulsson. 2012. Segregation of molecules at cell division reveals native protein localization. *Nat. Methods*. 9:480–482.
40. Wang, S., J. R. Moffitt, ..., X. Zhuang. 2014. Characterization and development of photoactivatable fluorescent proteins for single-molecule-based superresolution imaging. *Proc. Natl. Acad. Sci. USA*. 111:8452–8457.
41. Tuson, H. H., A. Aliaj, ..., J. S. Biteen. 2016. Addressing the requirements of high-sensitivity single-molecule imaging of low-copy-number proteins in bacteria. *ChemPhysChem*. 17:1435–1440.
42. Ghodke, H., V. E. Caldas, ..., A. Robinson. 2016. Single-molecule specific mislocalization of red fluorescent proteins in live *Escherichia coli*. *Biophys. J.* 111:25–27.
43. Shrager, R. I., and R. W. Hendler. 1998. Some pitfalls in curve-fitting and how to avoid them: a case in point. *J. Biochem. Biophys. Methods*. 36:157–173.
44. Kaiser, M. J. 2001. Nonlinear multiobjective optimization. *Interfaces*. 31:122–123.
45. Andrae, R., T. Schulze-Hartung, and P. Melchior. 2010. Dos and don'ts of reduced chi-squared. *arXiv*, arXiv:1012.3754 <https://arxiv.org/abs/1012.3754>.
46. Zou, H., T. Hastie, and R. Tibshirani. 2007. On the “degrees of freedom” of the lasso. *Ann. Stat.* 35:2173–2192.
47. Hansen, N. R., and A. Sokol. 2014. Degrees of freedom for nonlinear least squares estimation. *arXiv*, arXiv:1402.2997 <https://arxiv.org/abs/1402.2997>.
48. Tibshirani, R. 2014. Degrees of freedom and model search. *arXiv*, arXiv:1402.1920 <https://arxiv.org/abs/1402.1920>.

**Biophysical Journal, Volume 117**

**Supplemental Information**

**Identification of Multiple Kinetic Populations of DNA-Binding Proteins  
in Live Cells**

**Han N. Ho, Daniel Zalami, Jürgen Köhler, Antoine M. van Oijen, and Harshad Ghodke**

## Supplementary table

**Table S1.** Initial conditions, constraints and termination tolerance used in global fitting.  $n_0$  is the minimum number of counts in the second bin across  $\tau_{tl}$ .

| Model                  | Initial conditions                                                                                                                                             | Bound constraints                                                                                                                                                                                                                                                                                                            | Termination tolerance | Algorithm               | MATLAB function  |
|------------------------|----------------------------------------------------------------------------------------------------------------------------------------------------------------|------------------------------------------------------------------------------------------------------------------------------------------------------------------------------------------------------------------------------------------------------------------------------------------------------------------------------|-----------------------|-------------------------|------------------|
| <b>Mono</b><br>(Eq. 2) | $k_b = 1 \text{ s}^{-1}$<br>$k_{off} = 1 \text{ s}^{-1}$                                                                                                       | $k_b > 0 \text{ s}^{-1}$<br>$0 \text{ s}^{-1} < k_{off} < 1/\tau_{int} \text{ s}^{-1}$                                                                                                                                                                                                                                       | $10^{-6}$             | trust-region-reflective | <i>lsqnonlin</i> |
| <b>Bi</b><br>(Eq. 5)   | $k_b = 1 \text{ s}^{-1}$<br>$k_{off1} = 1 \text{ s}^{-1}$<br>$B = 0.5$<br>$k_{off2} = 2 \text{ s}^{-1}$                                                        | $k_b > 0$<br>$10^{-3} \text{ s}^{-1} < k_{off1} < 1/\tau_{int} \text{ s}^{-1}$<br>$1/n_0 < B < 1 - 1/n_0$<br>$10^{-3} \text{ s}^{-1} < k_{off2} < 1/\tau_{int} \text{ s}^{-1}$                                                                                                                                               | $10^{-6}$             | trust-region-reflective | <i>lsqnonlin</i> |
| <b>Tri</b><br>(Eq. 6)  | $k_b = 1 \text{ s}^{-1}$<br>$k_{off1} = 0.05 \text{ s}^{-1}$<br>$B_1 = 0.3$<br>$k_{off2} = 0.5 \text{ s}^{-1}$<br>$B_2 = 0.3$<br>$k_{off2} = 5 \text{ s}^{-1}$ | $k_b > 0 \text{ s}^{-1}$<br>$10^{-3} \text{ s}^{-1} < k_{off1} < 1/\tau_{int} \text{ s}^{-1}$<br>$1/n_0 < B_1 < 1 - 1/n_0$<br>$10^{-3} \text{ s}^{-1} < k_{off2} < 1/\tau_{int} \text{ s}^{-1}$<br>$1/n_0 < B_2 < 1 - 1/n_0$<br>$10^{-3} \text{ s}^{-1} < k_{off3} < 1/\tau_{int} \text{ s}^{-1}$<br>$B_1 + B_2 < 1 - 2/n_0$ | $10^{-9}$             | trust-region-reflective | <i>fmincon</i>   |

**Table S2.** The  $\tau_{tl}$  sets used in the study.

| $\tau_{tl}$ sets | $\tau_{tl}$ values (s)                     |
|------------------|--------------------------------------------|
| 10-s             | 0.1, 0.2, 0.3, 0.4, 0.6, 1, 2, 3, 5, 8, 10 |
| 100-s            | 0.1, 0.3, 0.7, 1, 3, 7, 10, 30, 70, 100    |
| Three-           | 0.1, 1, 10                                 |
| Five-            | 0.1, 0.3, 1, 3, 10                         |

## Supplementary figures

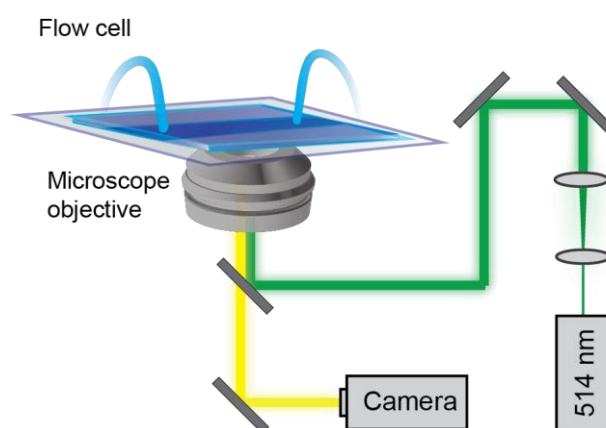

**Figure S1. Schematic of experimental setups in single-molecule live-cell imaging.** Bacteria expressing fluorescently labelled proteins are loaded in a flow cell with a constant supply of media at 30 °C. The fluorescent label (YPet) is excited with 514-nm light and fluorescence signal is recorded with an electron-multiplying CCD camera.

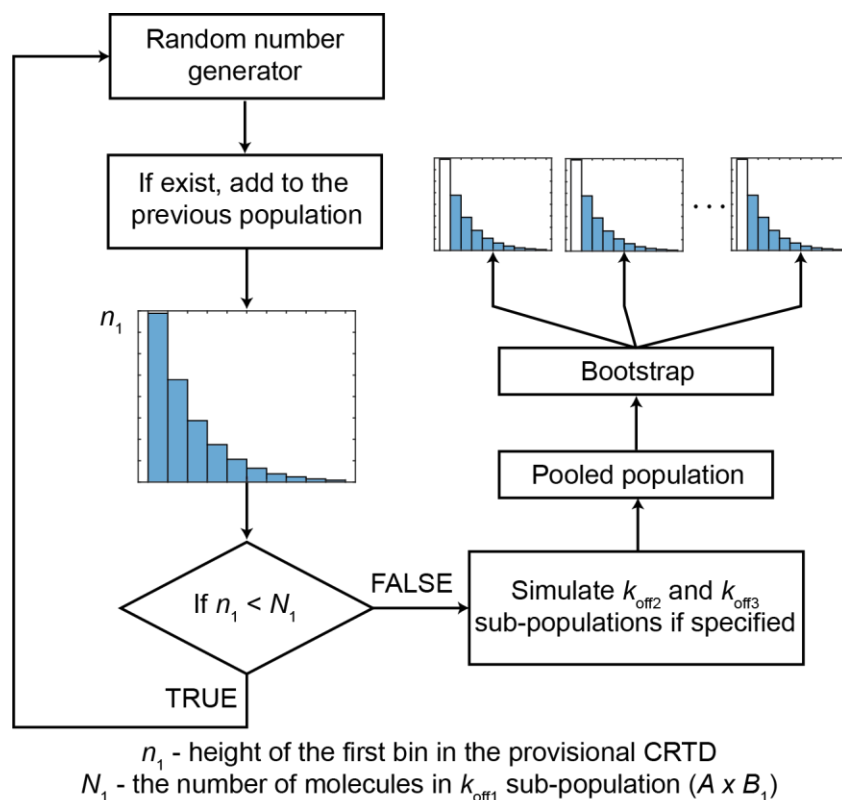

**Figure S2. Schematic of the simulation of the cumulative residence time distribution (CRTD) at a specified  $\tau_{\text{tl}}$ .** The molecules were generated by a random number generator to produce a group of numbers following an exponential distribution (defined by  $k_{\text{off}1}$ ,  $k_b$ ,  $\tau_{\text{int}}$  and  $\tau_{\text{tl}}$ ) (see Eq. 4-6 in main text). The number generator function was called a few times (typically 3-6) until the number of molecules in the first bin ( $n_1$ ) of the histogram exceeded the user-specified number of molecules ( $N_1$ ,  $N_1 = A \times B$  in mono-exponential distribution, or  $N_1 = A \times B_1$  in multiple-exponential distribution). The  $k_{\text{off}2}$  and  $k_{\text{off}3}$  sub-populations were simulated in the same manner. Then, molecules from all simulated sub-populations were pooled and subject to bootstrapping analysis to construct the bootstrapped CRTDs (referred simply as CRTDs). This procedure was repeated for all specified values of  $\tau_{\text{tl}}$ . The global fitting was performed on CRTDs from all  $\tau_{\text{tl}}$ , using a CRTD for each  $\tau_{\text{tl}}$ .

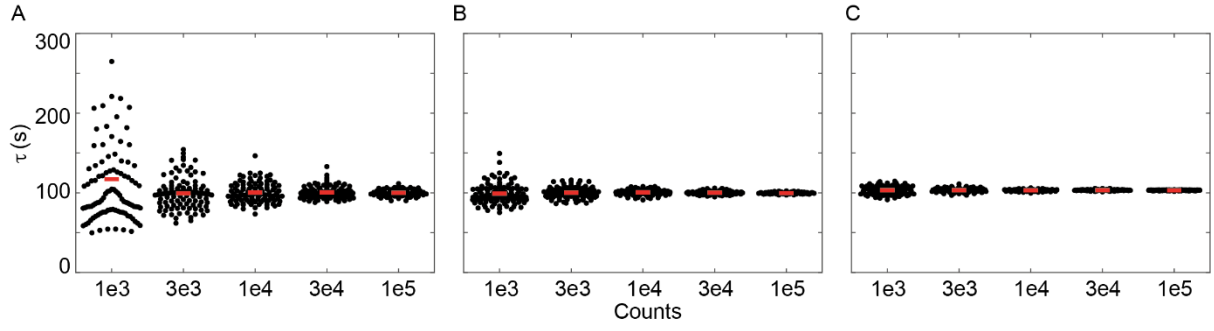

**Figure S3.** Scatter plots show distributions of  $\tau$  obtained using global fitting on 100 simulated mono-exponential ( $\langle \tau \rangle = 100$  s) for each  $n$  value. (A) Simulation using the 10-s  $\tau_{fl}$  set. (B) Simulation using the 100-s  $\tau_{fl}$  set. (C) Simulated data from (B) were globally fitted with the amplitude as the global parameter. Apart from this panel, all global fittings in this study were performed with  $A$  as the local parameter. Red bars represent the averages.

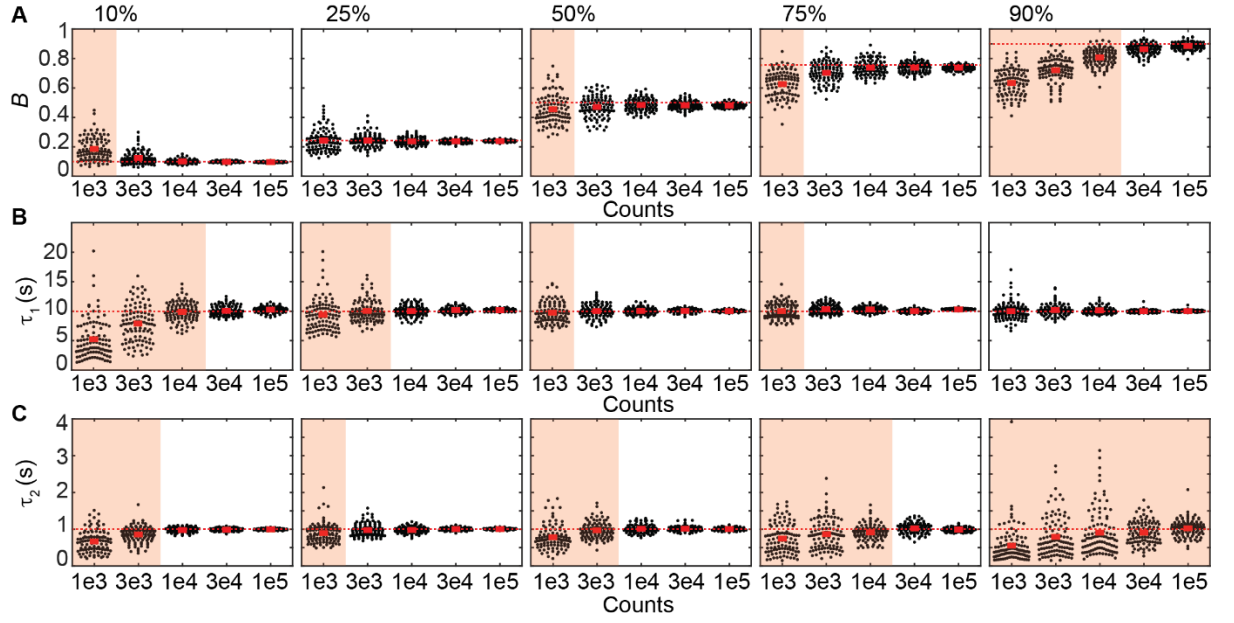

**Figure S4.** Determination of time constants and amplitudes from bi-exponential distributions with an intermediate rate ( $k_{\text{off}1}$ ) and a fast rate ( $k_{\text{off}2} = 10k_{\text{off}1}$ ). (A-C) Scatter plots show distributions of  $B$ ,  $\tau_1$  and  $\tau_2$  obtained using global fitting from 100 simulated distributions for each  $n$  value. Each panel corresponds to a pre-set  $B$ , which increases from 10%, 25%, 50%, 75% to 90% from left to right. In each panel,  $n$  increases from  $10^3$  (1e3) to  $10^5$  (1e5). Dashed lines and red bars represent the true values and the average respectively. Orange shades represent distributions where  $\sigma_B$  is larger than 0.1 or  $\sigma_\tau/\tau$  is larger than 20%. To enhance visibility, outliers (less than 5% when present) were omitted from scatter plots.

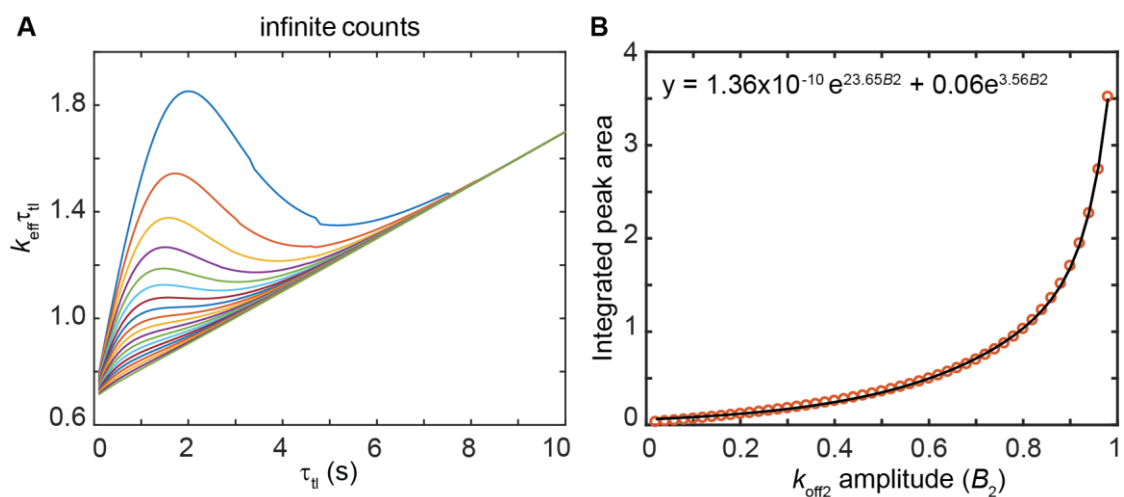

**Figure S5.** Bi-exponential distributions with an intermediate rate ( $k_{\text{off}1} = 0.1 \text{ s}^{-1}$ ) and a fast rate ( $k_{\text{off}2} = 1 \text{ s}^{-1}$ ) with infinite counts. (A) Representative  $k_{\text{eff}}\tau_{\text{tl}}$  plots at 20 amplitudes of  $k_{\text{off}2}$ . From top to bottom, the amplitude reduces from 95% to 5%. (B) Integrated peak areas as a function of  $k_{\text{off}2}$  amplitudes (open circles). Line is the exponential fit to data points ( $R^2: 0.9996$ ). The peak area is calculated as the difference between areas under the  $k_{\text{eff}}\tau_{\text{tl}}$  plots and the area under the line  $y = 0.7 + 0.1\tau_{\text{tl}}$ .

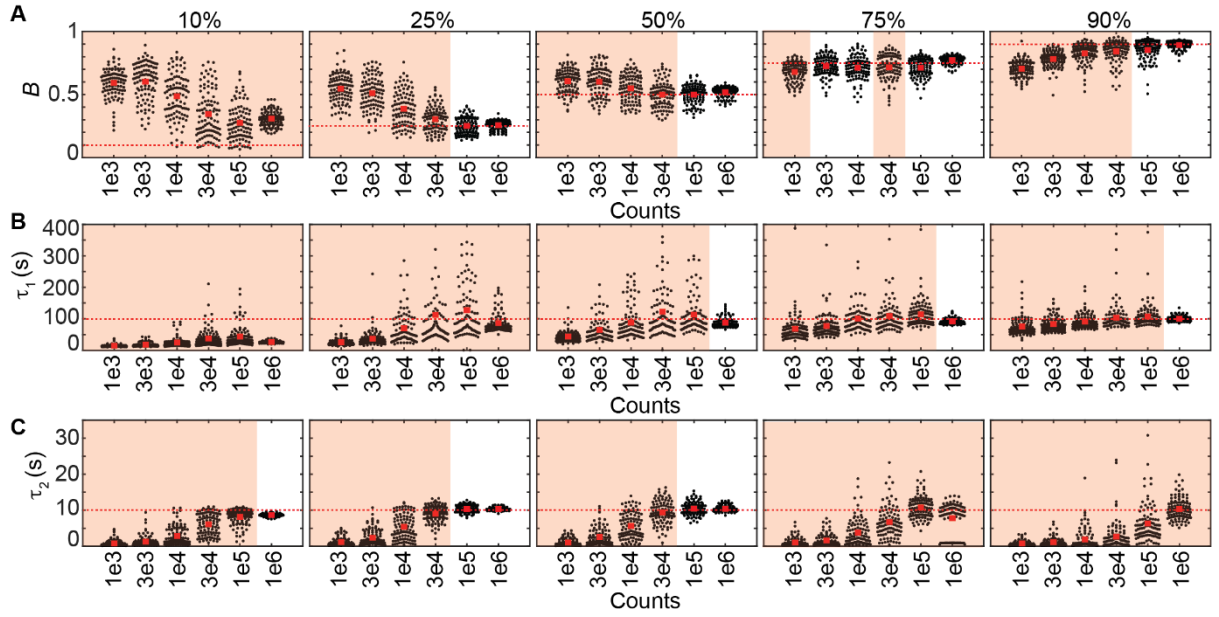

**Figure S6.** Determination of time constants and amplitudes from bi-exponential distributions with a slow rate ( $k_{\text{off}1} = 0.01 \text{ s}^{-1}$ ) and an intermediate rate ( $k_{\text{off}2} = 0.1 \text{ s}^{-1}$ ). (A-C) Scatter plots show distributions of  $B$ ,  $\tau_1$  and  $\tau_2$  obtained from fitting of 100 simulated distributions to bi-exponential model. Each panel corresponds to a pre-set amplitude of  $B$ , which increases from 10%, 25%, 50%, 75% to 90% from left to right. In each panel,  $n$  increases from  $10^3$  (1e3) to  $10^6$  (1e6). Dashed lines and red bars represent the true values and the average respectively. Orange shades represent distributions where  $\sigma_B$  is larger than 0.1 or  $\sigma_\tau/\tau$  is larger than 20%. To enhance visibility, outliers (less than 5% when present) were omitted from scatter plots.

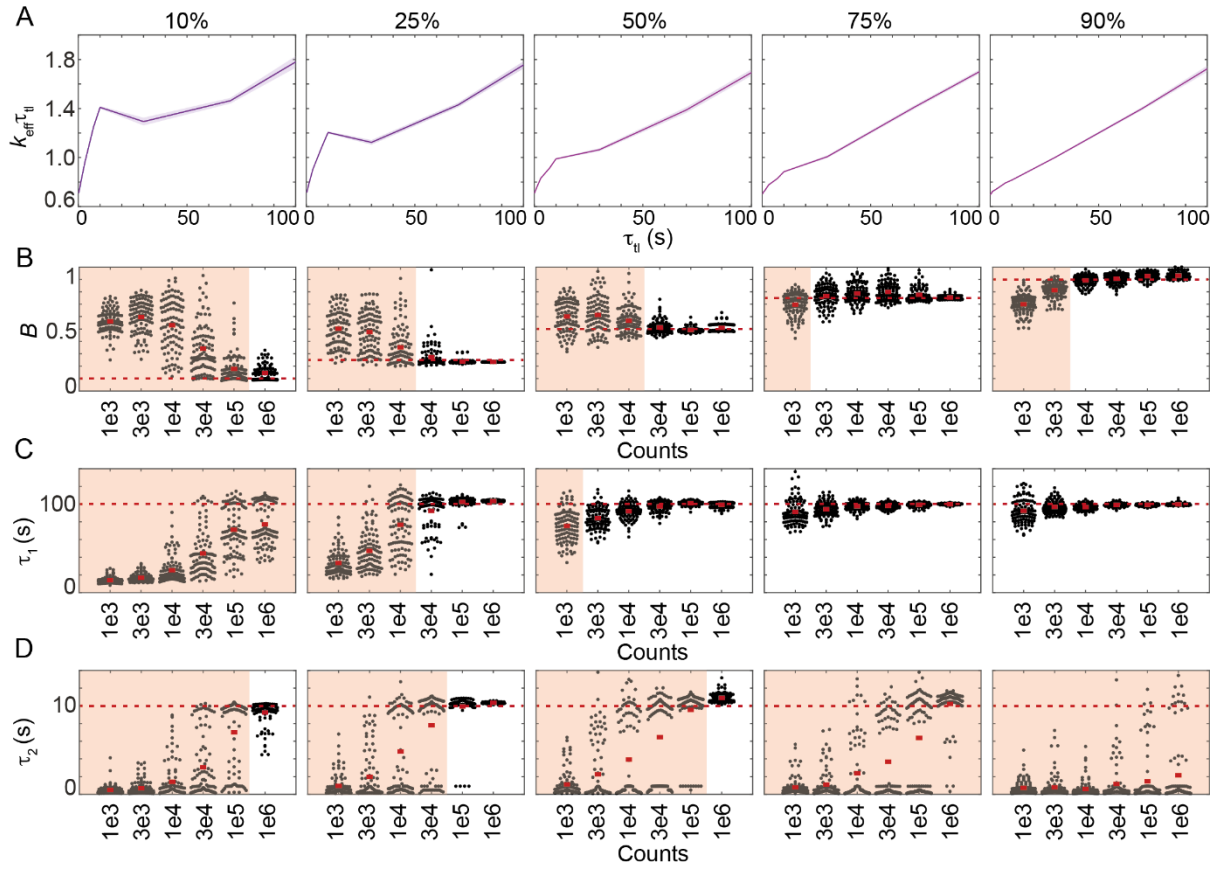

**Figure S7.** Determination of time constants and amplitudes from bi-exponential distributions with a slow rate ( $k_{\text{off}1}$ ) and an intermediate rate ( $k_{\text{off}2} = 10k_{\text{off}1}$ ), simulated using the 100-s  $\tau_{\text{ii}}$  set. (A)  $k_{\text{eff}}\tau_{\text{ii}}$  plots of bi-exponential distributions with  $k_{\text{b}\tau_{\text{int}}}$  of 0.7,  $k_{\text{off}1}$  and  $k_{\text{off}2}$  of 0.01 and 0.1  $\text{s}^{-1}$  respectively, with  $10^5$  observations. The amplitude of  $k_{\text{off}1}$  ( $B$ , shown on top) increases from left to right (10% to 90%). Shaded error bands are standard deviations from ten bootstrapped samples. (B-D) Scatter plots show distributions of  $B$ ,  $\tau_1$  and  $\tau_2$  obtained from fitting of 100 simulated distributions to bi-exponential model. Each panel corresponds to a pre-set amplitude of  $B$ , which increases from 10%, 25%, 50%, 75% to 90% from left to right. In each panel,  $n$  increases from  $10^3$  (1e3) to  $10^6$  (1e6). Dashed lines and red bars represent the true values and the average respectively. Orange shades represent distributions where  $\sigma_B$  is larger than 0.1 or  $\sigma_{\tau}/\tau$  is larger than 20%. To enhance visibility, outliers (less than 5% when present) were omitted from scatter plots.

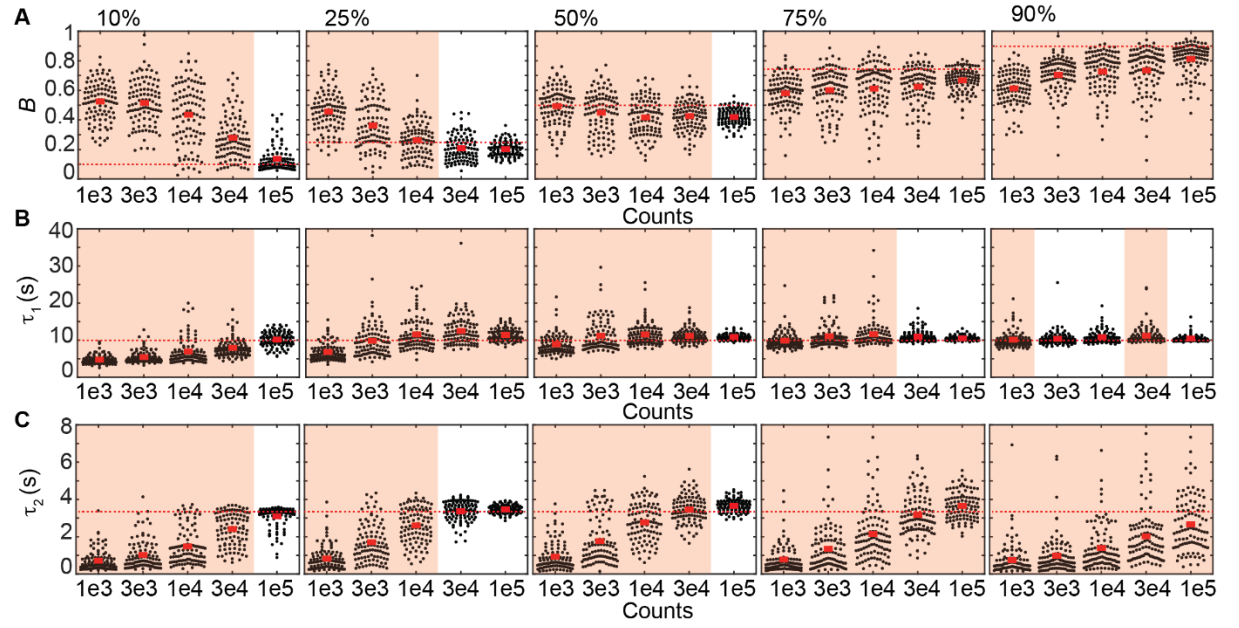

**Figure S8.** Determination of binding lifetimes and amplitudes from bi-exponential distributions with closely spaced rates ( $k_{\text{off}2} = 3k_{\text{off}1}$ ). (A-C) Scatter plots show distributions of  $B$ ,  $\tau_1$  and  $\tau_2$  obtained from fitting of 100 simulated distributions for each  $n$  value. Each panel corresponds to a pre-set  $B$ , which increases from 10%, 25%, 50%, 75% to 90% from left to right. In each panel,  $n$  increases from  $10^3$  (1e3) to  $10^5$  (1e5). Dashed lines and red bars represent the true values and the average respectively. Orange shades represent distributions where  $\sigma_B$  is larger than 0.1 or  $\sigma_\tau/\tau$  is larger than 20%. To enhance visibility, outliers (less than 5% when present) were omitted from scatter plots.

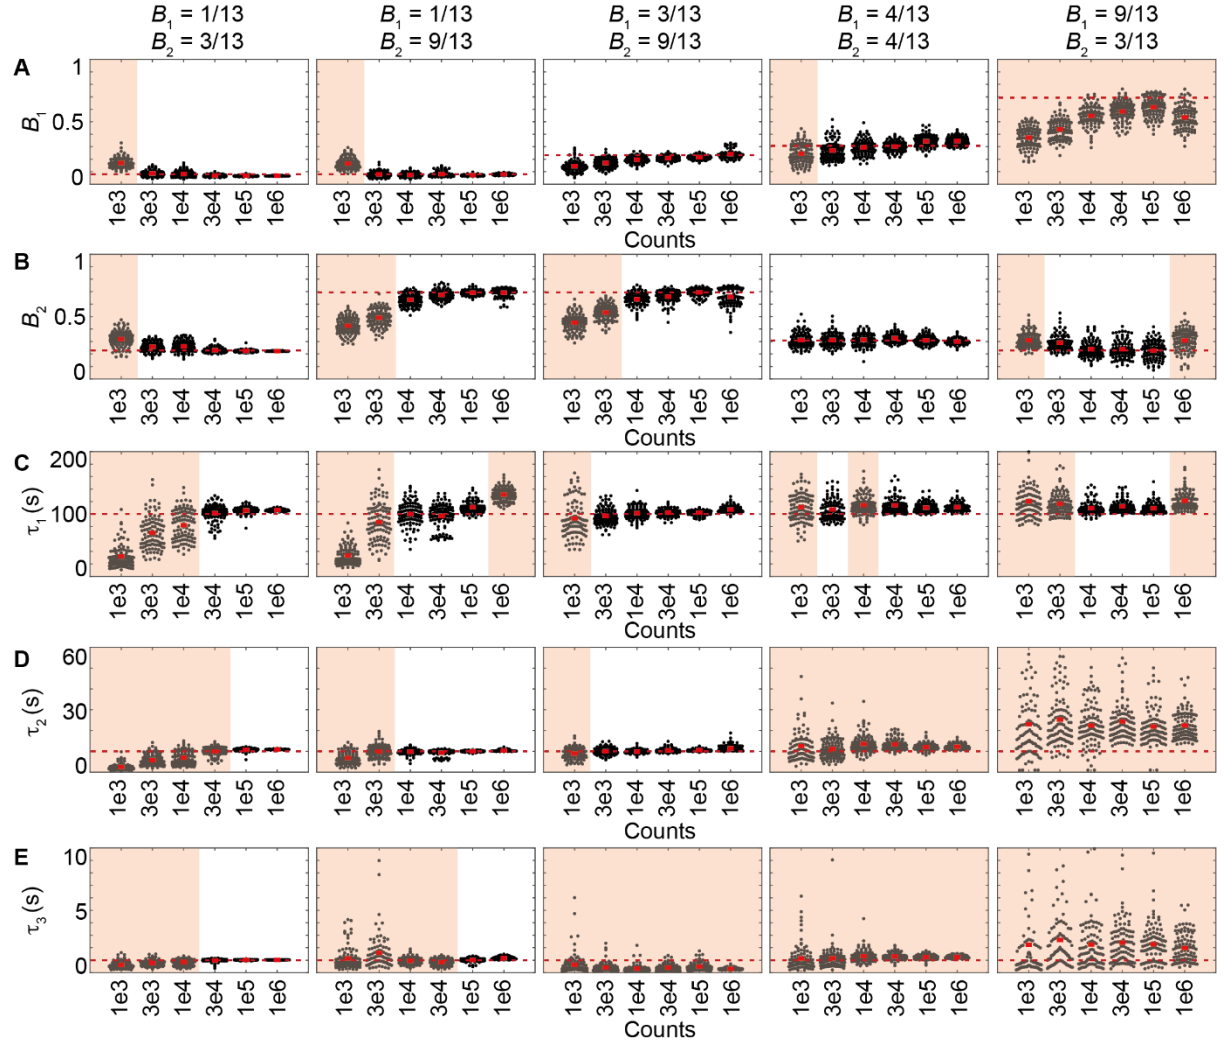

**Figure S9.** Determination of binding lifetimes and amplitudes from tri-exponential distributions with a slow rate ( $k_{\text{off}1}$ ), an intermediate rate ( $k_{\text{off}2} = 10k_{\text{off}1}$ ) and a fast rate ( $k_{\text{off}3} = 10k_{\text{off}2}$ ), using the 100-s  $\tau_{\text{II}}$  set. From left to right, five panels in each row correspond to different amplitudes of each sub-population (displayed on top). (A-E) Scatter plots show distributions of amplitudes ( $B_1$  and  $B_2$ ),  $\tau_1$ ,  $\tau_2$  and  $\tau_3$  obtained using global fitting 100 simulated samples. In each panel,  $n$  increases from  $10^3$  (1e3) to  $10^6$  (1e6). Dashed lines and red bars represent the true values and the averages respectively. Orange shades represent distributions where  $\sigma_B$  is larger than 0.1 or  $\sigma/\tau$  is larger than 20%. To enhance visibility, outliers (less than 5% when present) were omitted from scatter plots.

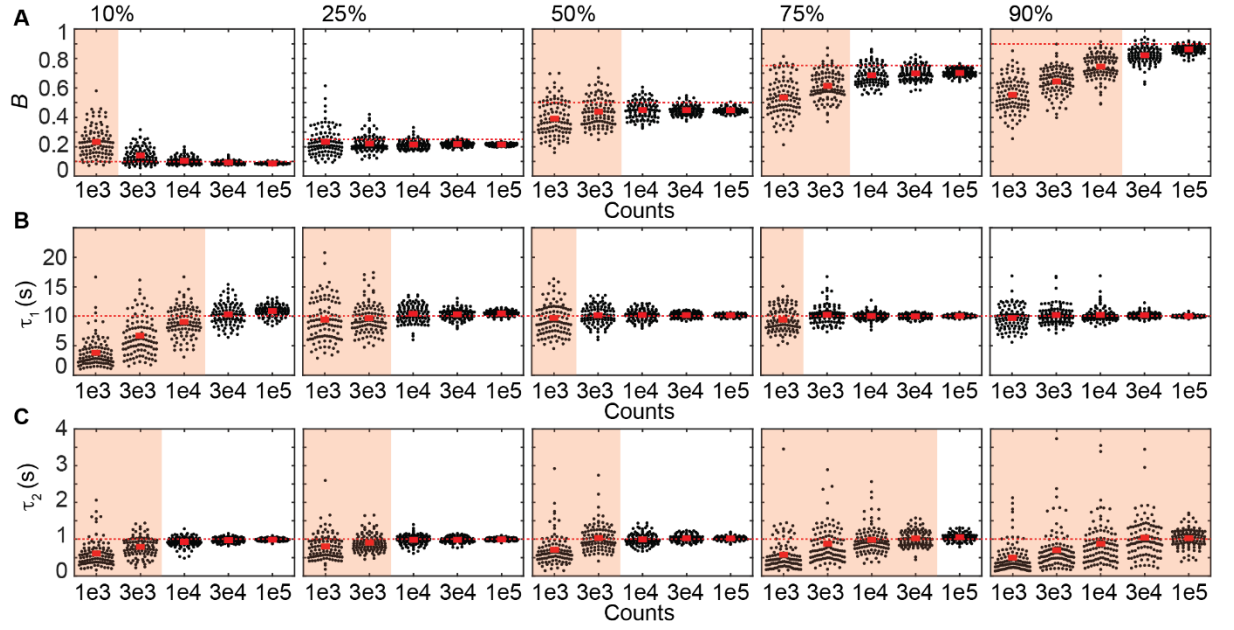

**Figure S10.** Determination of time constants and amplitudes from bi-exponential distributions simulated with the five  $\tau_{il}$  set, and an intermediate rate ( $k_{off1} = 0.1 \text{ s}^{-1}$ ) and a fast rate ( $k_{off2} = 1 \text{ s}^{-1}$ ). (A-C) Scatter plots show distributions of  $B$ ,  $\tau_1$  and  $\tau_2$  obtained from fitting of 100 simulated distributions to bi-exponential model. Each panel corresponds to a pre-set amplitude of  $B$ , which increases from 10%, 25%, 50%, 75% to 90% from left to right. In each panel,  $n$  increases from  $10^3$  (1e3) to  $10^5$  (1e5). Dashed lines and red bars represent the true values and the average respectively. Orange shades represent distributions where  $\sigma_B$  is larger than 0.1 or  $\sigma_\tau/\tau$  is larger than 20%. To enhance visibility, outliers (less than 5% when present) were omitted from scatter plots.

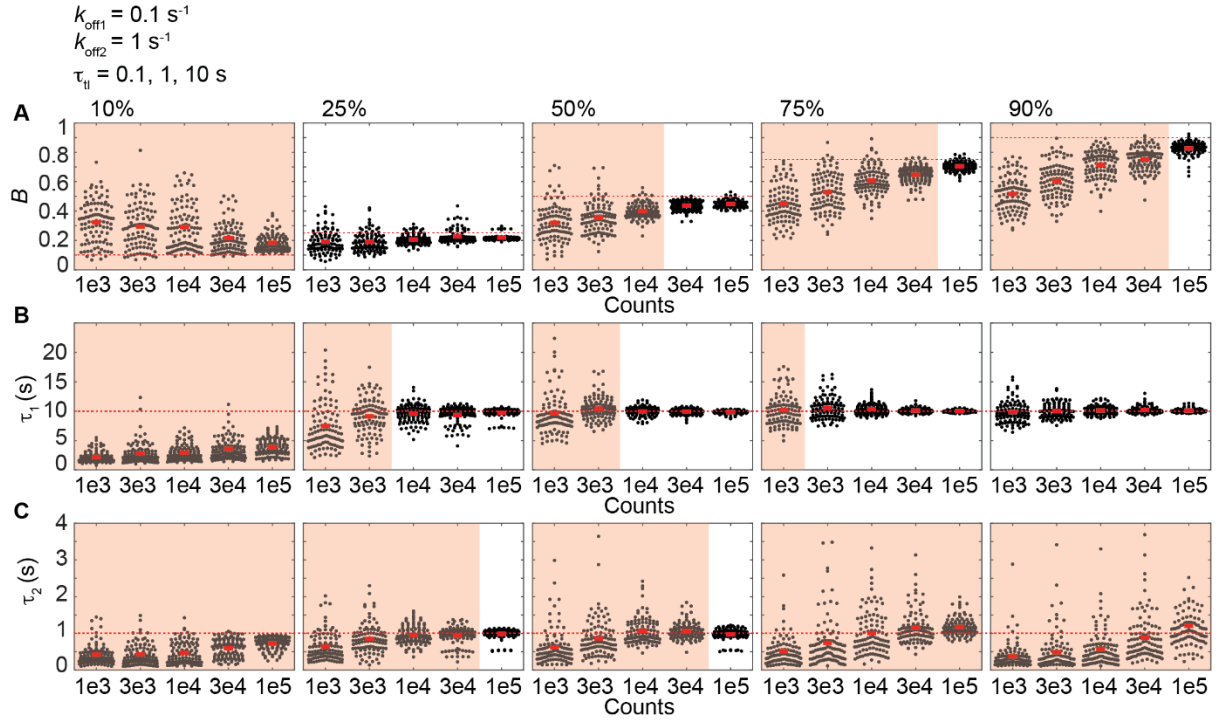

## Supplementary Notes

### 1. Simulation of a set of binding events whose lifetimes follow an exponential distribution with user-defined mean

```
function [counts, each_molecule] = simulate_res_time(mu,edges,n_count)
%%%%%%%%%%%%%%%%%%%%%%%%%%%%%%%%%%%%%%%%%%%%%%%%%%%%%%%%%%%%%%%%%%%%%%%%
%% Inputs:
%%     mu: mean of exponential distribution for a particular  $\tau_{t1}$ 
%%     edges: bin edges of histograms
%%     n_count: the number of counts for a particular  $\tau_{t1}$ 
%% Outputs:
%%     counts: vector describing CRTD
%%     each_molecule: vector containing all random number corresponding to
%%                     lifetimes of binding events
%%%%%%%%%%%%%%%%%%%%%%%%%%%%%%%%%%%%%%%%%%%%%%%%%%%%%%%%%%%%%%%%%%%%%%%%
each_molecule = [];
counts = zeros(10,1);
%% generate a set of random numbers corresponding to lifetimes of binding
%% events until counts in the first bin exceed user-defined counts
while counts(1) < n_count
% single iteration of the exprnd function
    sim = exprnd(mu,round(n_count/2.71),1);
% construct the histogram with edges corresponding to frame times
% N is a vector containing counts in all bins [from the latest iteration]
    [N,~] = histcounts(sim,edges);
    counts = counts + N'; % add counts to the previous iterations
% combine lifetimes of binding events to existing population from previous
% iteration of the exprnd function
    each_molecule = [each_molecule; sim];
end
end % end of the function
```

## 2. Simulation of mono-, bi- or tri-exponential distribution across all $\tau_{ij}$

```

%%%%%%%%%%%%%%%%%%%%%%%%%%%%%%%%%%%%%%%%%%%%%%%%%%%%%%%%%%%%%%%%%%%%%%%%
%% Inputs:
%%   ttl:    vector containing the set of time-lapse intervals
%%   kb:     photobleaching rate (unit: s-1)
%%   tint:   camera integration time
%%   koff1:  user-defined off rate 1
%%   koff2:  user-defined off rate 2
%%   koff3:  user-defined off rate 3
%%   B(1):   amplitude of the first kinetic sub-population
%%   B(2):   amplitude of the second kinetic sub-population
%%   n_count_total: user-defined counts for each simulation
%% Outputs:
%%   bin:    matrix containing CRTDs for all time-lapse intervals
%%   d.data: contains the simulated population at a particular time-
%%           lapse interval
%%%%%%%%%%%%%%%%%%%%%%%%%%%%%%%%%%%%%%%%%%%%%%%%%%%%%%%%%%%%%%%%%%%%%%%%
for i = 1:length(ttl) % simulate CRTD for each time-lapse interval
    time = ttl(i)*(0:10)'; % determine frame times for binning
    %% define exponential distribution for each sub-population
    keff1 = (kb*tint/ttl(i) + koff1); % effective rate 1
    % mean of the exponential distribution of the first sub-population
    mu1 = 1/keff1;
    keff2 = (kb*tint/ttl(i) + koff2); % effective rate 2
    % mean of the exponential distribution of the second sub-population
    mu2 = 1/keff2;
    keff3 = (kb*tint/ttl(i) + koff3); % effective rate 3
    % mean of the exponential distribution of the third sub-population
    mu3 = 1/keff3;
    %% determine the number of counts for each sub-population based
    %% on the amplitudes B1 and B2
    % counts of the first kinetic sub-population
    n_count1 = round(B(1)*n_count_total);
    % counts of the second kinetic sub-population
    n_count2 = round(B(2)*n_count_total);
    % counts of the third kinetic sub-population
    n_count3 = n_count_total - n_count1 - n_count2;
    % bin1, bin2 and bin3 are vectors containing CRTDs of koff1, koff2 and
    % koff3 sub-population respectively
    % population1, population2 and population3 are vectors containing
    % simulated koff1, koff2 and koff3 sub-population respectively.
    bin2 = zeros(10,1); population2 = [];
    bin3 = zeros(10,1); population3 = [];
    % simulate koff1 sub-population
    [bin1, population1] = simulate_res_time(mu1,time,n_count1);
    % simulate koff2 sub-population
    if n_count2 > 1
        [bin2, population2] = simulate_res_time(mu2,time,n_count2);
    end
    % simulate koff3 sub-population
    if n_count3 > 1
        [bin3, population3] = simulate_res_time(mu3,time,n_count3);
    end
    % combine CRTDs from sub-population CRTDs
    bin(:,i) = bin1 + bin2 + bin3;
    % combine simulated population from simulated sub-populations
    d(i).data = [population1; population2; population3];
end

```

### 3. Global fitting

```
function [p_out] = globalFit(i_model, X, Y, tint)
%%%%%%%%%%%%%%%%%%%%%%%%%%%%%%%%%%%%%%%%%%%%%%%%%%%%%%%%%%%%%%%%%%%%%%%%
%% Inputs:
%%     i_model = 1 - mono-exponential model
%%     i_model = 2 - bi-exponential model
%%     i_model = 3 - tri-exponential model
%%     X: matrix containing frame times of all time-lapse intervals
%%         - row: frame times corresponding to one time-lapse interval
%%         - column: increase in frame times
%%     Y: matrix containing simulated CRTDs of all time-lapse intervals
%%     tint: camera integration time
%%     para: initial conditions
%%         - mono-exponential model: [kb, koff1, counts]
%%         - bi-exponential model: [kb, koff1, B1, koff2, counts]
%%         - tri-exponential model: [kb, koff1, B1, koff2, B2, koff3, counts]
%%     lb: lower constraints
%%         - mono-exponential model: [kb, koff1, counts]
%%         - bi-exponential model: [kb, koff1, B1, koff2, counts]
%%         - tri-exponential model: [kb, koff1, B1, koff2, B2, koff3, counts]
%%     ub: upper constraints
%%         - mono-exponential model: [kb, koff1, counts]
%%         - bi-exponential model: [kb, koff1, B1, koff2, counts]
%%         - tri-exponential model: [kb, koff1, B1, koff2, B2, koff3, counts]
%% Outputs:
%%     p_out: vector containing outcomes of global fitting
%%         - p(1): kb
%%         - p(2): koff1
%%         - p(3): B1
%%         - p(4): koff2
%%         - p(5): B2
%%         - p(6): koff3
%%         - p(7): 1 - B1 - B2
%%         - p(8)-p(end): counts at time 0 for all time-lapse intervals
%%%%%%%%%%%%%%%%%%%%%%%%%%%%%%%%%%%%%%%%%%%%%%%%%%%%%%%%%%%%%%%%%%%%%%%%
%% Known Parameters
ttl = X(:,1); % vector containing all time-lapse intervals
a_para = Y(:,1); % Initialize the vector for counts at time 0
weights = ones(size(X)); % fitting weights
lower_B = 1/min(a_para(a_para>0)); % the lower bound for the amplitudes
upper_koff = 1/tint; % the upper bound for off rates
if i_model == 1 % fitting to mono-exponential function
    para = [1, 1, a_para']; % initial conditions: kb, koff1, counts
    lb = [0, 0, zeros(size(ttl))']; % lower bounds: kb, koff1, counts
    % upper bounds: kb, koff1, counts
    ub = [Inf, upper_koff, Inf*ones(size(ttl))'];
    % define function to minimize
    f1 = @(p) (model(i_model,p,X,tint,ttl)-Y).*weights );
    opts = optimset('Display','off');
    % Global fitting using the lsqnonlin function
    [p] = lsqnonlin(f1,para,lb,ub,opts);
    p_out = [p(1:2),1,zeros(1,4),p(3:end)];
elseif i_model == 2 % fitting to bi-exponential function
    para = [1, 1, 0.5, 2, a_para'];
    lb = [0, 1e-3, lower_B, 1e-3, zeros(size(ttl))'];
    ub = [Inf, upper_koff, 1-lower_B, upper_koff, Inf*ones(size(ttl))'];
    % define function to minimize
    f1 = @(p) (model(i_model,p,X,tint,ttl)-Y).*weights );
    opts = optimset('Display','off');
```

```

% Global fitting using the lsqnonlin function
[p] = lsqnonlin(f1,para,lb,ub,opts);
% assign the smaller off rate to be koff1
p_temp = sortrows([p(2) p(3); p(4) (1 - p(3))]);
p_temp = p_temp';
p_out = [p(1), p_temp(:)', zeros(1,2), p(5:end)];
elseif i_model == 3
para = [1, 0.05, 0.3, 0.5, 0.3, 5, a_para'];
lb = [0, 1e-3, lower_B, 1e-3, lower_B, 1e-3, zeros(size(ttl))'];
ub = [Inf, upper_koff, 1-lower_B, upper_koff, 1-lower_B, upper_koff,
      Inf*ones(size(ttl))'];
% define function to minimize
f1 = @(p) ( sum(sum((model(i_model,p,X,tint,ttl)-Y).^2.*weights,2) ));
opts = optimoptions('fmincon', 'MaxFunctionEvaluations',10000,...
                    'MaxIter',3000,'Algorithm','interior-point','StepTolerance',
                    1.0000e-9);
b = 1-2*lower_B;
A = [0,0,1,0,1,0,zeros(1,size(a_para,1))];
% Global fitting using the fmincon function
[p] = fmincon(f1,para,A,b,[],[],lb,ub,[],opts);
% assign the smallest off rate to be koff1 and the second smallest to
% be koff2
p_temp = sortrows([p(2) p(3); p(4) p(5); p(6) (1-p(3)-p(5))]);
p_temp = p_temp';
p_out = [p(1),p_temp(:)',p(7:end)];
end
end % end of function

```

#### 4. Define fitting models

```

function f = model(i_model,para,X,tint,ttl)
%%%%%%%%%%%%%%%%%%%%%%%%%%%%%%%%%%%%%%%%%%%%%%%%%%%%%%%%%%%%%%%%%%%%%%%%
%% Inputs:
%%   i_model = 1 - mono-exponential model
%%   i_model = 2 - bi-exponential model
%%   i_model = 3 - tri-exponential model
%%   para: global parameters
%%   X:     frame times
%%   tint: camera integration times
%%   ttl: time-lapse time
%%%%%%%%%%%%%%%%%%%%%%%%%%%%%%%%%%%%%%%%%%%%%%%%%%%%%%%%%%%%%%%%%%%%%%%%
% ampl: vector containing counts for all time-lapse intervals
p = tint./ttl; p = p(:);
if i_model == 1
    kb = para(1);
    koff1 = para(2);
    ampl = para(3:end);
    % mono-exponential model
    f = (ampl'*ones(1,size(X,2))).*(
        exp(-((kb.*p + koff1)*ones(1,size(X,2))).*X));
elseif i_model == 2 % bi-exponential model
    kb = para(1);
    koff1 = para(2);
    B1 = para(3);
    koff2 = para(4);
    ampl = para(5:end);
    % bi-exponential model
    f = (ampl'*ones(1,size(X,2))).*(B1.*exp(-((kb.*p + koff1)*
        ones(1,size(X,2))).*X)+(1-B1).*exp(-((kb.*p + koff2)*
        ones(1,size(X,2))).*X));

```

```

elseif i_model == 3
    kb = para(1);
    koff1 = para(2);    B1 = para(3);
    koff2 = para(4);    B2 = para(5);
    koff3 = para(6);
    ampl = para(7:end);
    % tri-exponential model
    f = (ampl'*ones(1,size(X,2))).*
        (B1.*exp(-((kb.*p + koff1) * ones(1,size(X,2))).*X)
        + B2.* exp( -(kb.*p + koff2)*ones(1,size(X,2)).*X )+
        (1-B1-B2).* exp( -(kb.*p + koff3)*ones(1,size(X,2)).*X ));
end
end % end of function

```
